# Supplementary material for: Exploring immune-related signatures for predicting immunotherapeutic responsiveness, prognosis, and diagnosis of patients with colon cancer
Source: Aging (Albany NY). 2022 Jun 20;14(12):5131–52. doi: 10.18632/aging.204134 (PMC9271306; doi:10.18632/aging.204134)
Supplement: Supplementary Table 4 [file aging-14-204134-s003.xlsx]

## Sheet: Supplementary Table 4
Supplementary Table 4. The detailed information of the immunotherapeutic response related DEGs.
GeneName	logFC	logCPM	LR	PValue	FDR	change
BMX	3.48703	3.41512	197.684	6.68594e-45	2.07839e-40	UP
WDR87	4.54154	-1.22064	195.645	1.8635e-44	2.89644e-40	UP
RGAG1	3.06104	0.307025	175.914	3.78026e-40	3.91711e-36	UP
COL2A1	4.44298	2.81549	172.645	1.95658e-39	1.52056e-35	UP
MUC19	4.15651	0.527357	152.074	6.10308e-35	3.79441e-31	UP
GFI1B	3.70763	-0.466044	151.027	1.03369e-34	5.35556e-31	UP
PPP1R17	7.72341	-0.63058	133.242	8.00366e-31	3.55431e-27	UP
OR5AU1	4.40046	-2.36744	130.322	3.48459e-30	1.35402e-26	UP
GABRG1	5.38887	-1.45915	129.946	4.2105e-30	1.45431e-26	UP
DCX	4.62091	-1.15755	129.328	5.7502e-30	1.78751e-26	UP
NPY	8.07268	1.07696	122.324	1.96058e-28	5.54059e-25	UP
NCAN	3.50268	-2.13675	118.456	1.37766e-27	3.56882e-24	UP
COL11A2	1.85928	3.48794	116.024	4.69515e-27	1.10426e-23	UP
RGS13	2.81464	1.3935	115.91	4.97318e-27	1.10426e-23	UP
CACNA1A	2.30153	1.33574	115.136	7.34962e-27	1.52314e-23	UP
REN	3.80206	5.11116	110.631	7.12862e-26	1.385e-22	UP
SCG3	3.58702	-0.0529431	109.585	1.20787e-25	2.2087e-22	UP
MORC1	4.96805	0.0807697	108.24	2.38134e-25	4.11257e-22	UP
CHRNA3	2.80589	-0.296442	103.954	2.07114e-24	3.38861e-21	UP
FAM150A	2.70405	1.47162	103.165	3.0841e-24	4.79362e-21	UP
CCDC129	4.33864	-0.916919	99.8873	1.61322e-23	2.38803e-20	UP
SEZ6	4.0974	-2.64839	99.0317	2.48488e-23	3.51113e-20	UP
NHLH1	3.11199	-3.37593	97.4492	5.52572e-23	7.46837e-20	UP
FAM57B	2.50174	-2.3974	96.8599	7.44109e-23	9.63808e-20	UP
ACTN3	2.83507	-0.42698	95.2862	1.64762e-22	2.04871e-19	UP
NEUROD1	8.8402	-0.0225283	94.1723	2.89215e-22	3.4579e-19	UP
SRRM4	5.71196	-1.977	92.5457	6.57883e-22	7.57442e-19	UP
DLL3	2.66169	0.0494641	91.4052	1.17069e-21	1.29971e-18	UP
CHRNB2	2.53105	-0.597596	90.8078	1.58325e-21	1.69713e-18	UP
WIF1	4.25591	1.08203	89.6647	2.82144e-21	2.92358e-18	UP
HEPACAM2	3.13909	0.958173	87.165	9.98372e-21	1.00114e-17	UP
SV2C	2.12617	-0.171385	84.0935	4.71921e-20	4.58442e-17	UP
KRT33B	3.78772	-0.801091	81.9922	1.36622e-19	1.28535e-16	UP
POU2F3	2.0309	2.81061	81.9357	1.40584e-19	1.28535e-16	UP
ATP8A2	1.88723	0.926428	81.6752	1.60397e-19	1.4246e-16	UP
LY6H	2.73598	-1.73172	81.366	1.87559e-19	1.61957e-16	UP
PKD2L1	2.17001	-0.886778	81.1973	2.04275e-19	1.71624e-16	UP
HPCA	1.89376	-2.45006	77.8542	1.10934e-18	9.07502e-16	UP
UNC80	2.30325	0.618626	77.3213	1.45291e-18	1.15808e-15	UP
NTRK1	2.18331	1.33727	75.8578	3.04845e-18	2.3691e-15	UP
CHAT	5.52399	0.764973	75.0075	4.68926e-18	3.55537e-15	UP
CSMD3	2.83173	3.91591	73.9346	8.07487e-18	5.97656e-15	UP
MSX1	1.72482	0.259697	72.6782	1.52608e-17	1.10325e-14	UP
HCN1	3.68349	-1.18278	70.9755	3.61695e-17	2.55538e-14	UP
HPX	-4.11292	4.1164	68.3749	1.35188e-16	9.33881e-14	DOWN
FAT3	2.03309	5.40617	68.293	1.40918e-16	9.52299e-14	UP
CFHR1	-4.53136	4.28024	68.2478	1.44188e-16	9.53663e-14	DOWN
GPR50	4.46886	0.983242	67.7221	1.88239e-16	1.20787e-13	UP
CDH7	4.20959	0.643622	67.6997	1.90393e-16	1.20787e-13	UP
ELAVL4	1.85528	-0.460293	66.9633	2.76606e-16	1.71323e-13	UP
GRIA2	2.67752	0.463538	66.9317	2.81074e-16	1.71323e-13	UP
PEX5L	3.11617	-1.25415	66.6229	3.28751e-16	1.9653e-13	UP
CNTN2	2.29291	-1.67091	65.6922	5.27136e-16	3.0918e-13	UP
STAC2	3.07674	1.01497	65.3765	6.18719e-16	3.56176e-13	UP
CDH15	2.78624	0.0987837	64.9506	7.68008e-16	4.34078e-13	UP
LOC494127	3.00784	-3.37654	64.2312	1.10642e-15	6.14181e-13	UP
SHD	2.20223	-1.73284	63.7961	1.37983e-15	7.45116e-13	UP
PPM1E	2.08053	0.304907	63.7814	1.39023e-15	7.45116e-13	UP
SYP	1.58742	-1.60358	63.1744	1.89189e-15	9.96802e-13	UP
CYP2E1	-3.44012	3.56707	62.5646	2.57842e-15	1.33588e-12	DOWN
NDST3	2.44889	-0.858124	62.2609	3.00835e-15	1.53308e-12	UP
INSRR	2.35159	-0.763098	61.9636	3.49867e-15	1.75099e-12	UP
TUBB2B	2.03145	2.7585	61.9357	3.54861e-15	1.75099e-12	UP
ITIH3	-3.53463	3.56786	61.5121	4.40025e-15	2.13728e-12	DOWN
DPYSL5	4.02619	-0.317593	61.2077	5.13599e-15	2.45627e-12	UP
GDAP1L1	3.60528	-3.13461	61.0491	5.5669e-15	2.62201e-12	UP
CACNA2D2	1.79499	1.74781	60.9205	5.94281e-15	2.75729e-12	UP
SERPINC1	-4.62035	2.94765	59.6511	1.13255e-14	5.17743e-12	DOWN
C1orf61	2.86492	-2.54339	59.4244	1.27081e-14	5.72526e-12	UP
BEX1	2.36653	-0.364899	58.7964	1.74863e-14	7.76541e-12	UP
TMSB15A	1.81338	0.675443	58.7366	1.80254e-14	7.89208e-12	UP
TAGLN3	2.32621	-2.22768	58.5612	1.97067e-14	8.50835e-12	UP
LRRN3	1.62116	1.10123	58.3684	2.17356e-14	9.25578e-12	UP
HPD	-4.05139	3.21911	58.1374	2.4444e-14	1.02685e-11	DOWN
NRSN1	3.7285	-3.45468	58.1044	2.48566e-14	1.03026e-11	UP
SLITRK5	2.13085	1.40204	57.7693	2.94727e-14	1.20551e-11	UP
SEMG2	4.07083	3.58072	57.4661	3.43862e-14	1.38822e-11	UP
LOC151760	2.16898	-1.01435	57.3842	3.58469e-14	1.42864e-11	UP
ATP2B3	2.14249	-1.19062	57.3385	3.66896e-14	1.44371e-11	UP
GRID2	2.39525	-0.00697521	56.8753	4.64332e-14	1.80428e-11	UP
C9	-5.07876	3.22908	56.4831	5.66843e-14	2.17542e-11	DOWN
CACNA1G	1.5655	1.11658	55.5079	9.3084e-14	3.52879e-11	UP
PIRT	4.75851	-3.0454	55.265	1.05327e-13	3.92676e-11	UP
CPA4	2.1897	3.5347	55.2505	1.06108e-13	3.92676e-11	UP
HP	-5.59548	8.37464	54.7938	1.33865e-13	4.89568e-11	DOWN
ATCAY	2.84456	-2.08019	54.3008	1.7203e-13	6.2183e-11	UP
ALB	-5.79247	8.50241	54.1559	1.85198e-13	6.57535e-11	DOWN
PRDM12	6.67124	-2.6115	54.1459	1.86139e-13	6.57535e-11	UP
F2	-4.44112	2.80063	53.7181	2.31427e-13	8.08329e-11	DOWN
GOLGA6L6	4.18818	-1.73596	53.6094	2.44582e-13	8.44786e-11	UP
KIF1A	2.48214	2.97252	52.3316	4.6877e-13	1.60134e-10	UP
UGT3A2	2.05763	-0.458949	52.2376	4.91752e-13	1.66159e-10	UP
SLC3A1	-2.82965	1.99871	51.7317	6.36285e-13	2.12683e-10	DOWN
ARG1	-4.84759	1.49468	51.5534	6.96772e-13	2.30424e-10	DOWN
ADAMTS18	1.60428	1.97204	51.4669	7.28146e-13	2.38265e-10	UP
NEUROD4	5.00595	-2.14967	51.3996	7.53545e-13	2.44007e-10	UP
NAPSA	-2.64338	1.45542	51.2298	8.21625e-13	2.6331e-10	DOWN
CAMKV	2.14719	-2.55455	50.9083	9.67825e-13	3.06998e-10	UP
ADH1A	-4.82445	1.23523	50.8385	1.00286e-12	3.14899e-10	DOWN
EPHA5	2.17025	-0.532041	50.6343	1.11282e-12	3.45931e-10	UP
LINC00461	3.17093	-2.94167	50.5103	1.18543e-12	3.64853e-10	UP
MYBPHL	2.21406	-2.47376	50.0161	1.52492e-12	4.64743e-10	UP
ITIH1	-4.76167	2.86374	49.8239	1.6818e-12	5.03026e-10	DOWN
CABS1	4.42876	-3.62425	49.8226	1.6829e-12	5.03026e-10	UP
MYBPC2	-3.66018	2.23883	49.7512	1.74535e-12	5.16723e-10	DOWN
TF	-3.16232	4.98738	49.5373	1.94636e-12	5.70799e-10	DOWN
ST8SIA3	4.57604	-2.38581	49.315	2.1799e-12	6.33312e-10	UP
ZMAT4	2.31255	-1.23121	49.1181	2.41002e-12	6.93685e-10	UP
SPINK2	2.27192	-2.47004	49.0695	2.47052e-12	7.04574e-10	UP
GSG1L	2.41918	-3.29166	48.9301	2.65248e-12	7.49591e-10	UP
TTBK1	1.27398	-1.45787	48.751	2.90609e-12	8.13862e-10	UP
DRD2	2.09167	-0.591536	48.6837	3.00762e-12	8.34776e-10	UP
SCGB3A1	3.0018	0.247107	48.5146	3.27844e-12	9.01891e-10	UP
RAB3IP	1.20425	6.21716	47.8423	4.61909e-12	1.25955e-09	UP
SERPINF2	-2.10478	2.70502	47.7582	4.82163e-12	1.30335e-09	DOWN
MOGAT1	2.18679	-2.12402	47.4124	5.75177e-12	1.54138e-09	UP
CRMP1	1.2654	1.01213	46.9623	7.23669e-12	1.92273e-09	UP
FSTL5	2.54602	0.569745	46.903	7.45876e-12	1.96494e-09	UP
OBP2B	4.39705	-2.81193	46.8285	7.74773e-12	2.02392e-09	UP
KCNA4	2.786	-3.12531	46.6415	8.52361e-12	2.20804e-09	UP
DLK1	3.81291	-2.26165	46.3416	9.93339e-12	2.55198e-09	UP
MYH15	1.37505	1.09457	46.2625	1.03426e-11	2.63533e-09	UP
MYBL2	1.04328	5.94045	45.6427	1.41913e-11	3.58659e-09	UP
CPLX3	2.05542	-2.61175	45.3217	1.67188e-11	4.1913e-09	UP
TCEAL5	2.01079	-0.892294	45.2474	1.73647e-11	4.31838e-09	UP
CCDC175	1.75652	-2.29347	44.5493	2.48031e-11	6.11928e-09	UP
LECT1	4.50829	-2.9092	44.5207	2.51686e-11	6.16056e-09	UP
TFAP2B	2.52126	1.93399	44.4422	2.61976e-11	6.36234e-09	UP
MYLK3	1.18743	-1.3193	44.0227	3.24582e-11	7.82168e-09	UP
WFDC3	1.50814	-1.32744	43.9235	3.41462e-11	8.16515e-09	UP
APOA1	-5.39693	2.62704	43.6203	3.98674e-11	9.46044e-09	DOWN
AKR1B1	1.15119	8.07537	43.5477	4.13748e-11	9.74377e-09	UP
IL13RA2	1.69046	1.61056	43.4311	4.3915e-11	1.02642e-08	UP
KIF19	1.35511	-0.326042	43.2313	4.86373e-11	1.12056e-08	UP
LRRC3B	2.11028	-2.07282	43.2253	4.87853e-11	1.12056e-08	UP
CYP3A4	-4.96975	3.11159	43.2158	4.90241e-11	1.12056e-08	DOWN
LOC100134091	1.71496	-2.42904	43.0934	5.21878e-11	1.18417e-08	UP
DPYS	-2.82242	1.18015	42.9054	5.74525e-11	1.29418e-08	DOWN
PSD2	1.66565	-0.47621	42.8206	5.99979e-11	1.34179e-08	UP
VNN1	-2.01744	1.31741	42.5848	6.7685e-11	1.5029e-08	DOWN
C8B	-6.56088	2.85782	42.5527	6.88027e-11	1.51688e-08	DOWN
SCGB2A2	5.1394	-3.18794	42.2382	8.08076e-11	1.769e-08	UP
PLG	-6.43479	4.07839	42.2109	8.19407e-11	1.78127e-08	DOWN
SFTPB	-7.60827	3.69297	42.1711	8.36277e-11	1.80531e-08	DOWN
BCAN	2.32067	-3.039	41.4266	1.22382e-10	2.62369e-08	UP
APOB	-4.02503	7.18489	41.365	1.26299e-10	2.68912e-08	DOWN
CNTNAP2	1.96669	1.52526	41.094	1.4508e-10	3.068e-08	UP
F11	-4.03391	0.995363	40.9435	1.5669e-10	3.29113e-08	DOWN
HAMP	-2.75985	2.91445	40.748	1.73185e-10	3.61316e-08	DOWN
TMPRSS5	1.01425	-1.82088	40.6205	1.84861e-10	3.83105e-08	UP
SERPINA1	-2.40628	8.53034	40.5844	1.883e-10	3.87649e-08	DOWN
ANKRD34C	2.25184	-3.73739	40.1274	2.37928e-10	4.86594e-08	UP
ORM1	-5.41082	7.03914	40.1051	2.40661e-10	4.88966e-08	DOWN
FSD1	1.36456	0.33815	39.9899	2.55284e-10	5.1531e-08	UP
MAST1	1.22965	0.591336	39.874	2.70882e-10	5.43267e-08	UP
TRPM5	1.79861	-0.983274	39.8548	2.73557e-10	5.45115e-08	UP
HMX2	2.99763	-3.77795	39.7851	2.83502e-10	5.61333e-08	UP
ACE2	1.50855	1.91463	39.7155	2.9379e-10	5.78022e-08	UP
ESPNL	1.70094	-2.44793	39.6958	2.9677e-10	5.80214e-08	UP
TAT	-5.07543	2.51005	39.5167	3.25269e-10	6.31957e-08	DOWN
VSTM2L	1.93933	-0.518299	39.4784	3.31704e-10	6.36504e-08	UP
CNDP1	1.55599	-0.267198	39.3396	3.56145e-10	6.7921e-08	UP
PRL	2.7778	-3.37362	39.2792	3.6734e-10	6.96289e-08	UP
CRABP1	2.11063	-0.688452	39.1666	3.8915e-10	7.33159e-08	UP
SLC34A2	-3.49304	4.84173	39.1388	3.94729e-10	7.39189e-08	DOWN
CFHR4	-5.37712	1.16505	39.0222	4.19018e-10	7.79976e-08	DOWN
PCDH11X	1.68763	1.42759	38.8936	4.47535e-10	8.281e-08	UP
LRP2	1.92645	5.75055	38.8266	4.63178e-10	8.51973e-08	UP
HPR	-5.29754	1.64056	38.8147	4.66007e-10	8.52135e-08	DOWN
SEMG1	3.56408	4.18769	38.7377	4.84754e-10	8.81232e-08	UP
RAB44	-2.00559	0.0391561	38.4718	5.55503e-10	1.00398e-07	DOWN
HRG	-5.96522	3.80736	37.9741	7.16897e-10	1.28818e-07	DOWN
C11orf53	1.86725	-1.46197	37.6341	8.53393e-10	1.52463e-07	UP
ASGR2	-2.28768	0.188283	37.6198	8.59668e-10	1.52707e-07	DOWN
PABPN1L	2.2177	-3.74654	37.4915	9.18145e-10	1.62167e-07	UP
GUCY2C	-2.93195	-0.364249	37.4192	9.52784e-10	1.67335e-07	DOWN
GAD2	4.04678	-2.5597	37.3424	9.91083e-10	1.73083e-07	UP
YEATS4	1.2302	4.8635	37.2047	1.06357e-09	1.84704e-07	UP
TUBB4A	1.67172	0.841212	37.1717	1.08173e-09	1.86815e-07	UP
A1BG	-2.04178	1.64641	36.9502	1.21188e-09	2.06992e-07	DOWN
CDH17	-2.78136	2.30693	36.9005	1.24317e-09	2.11175e-07	DOWN
SERPIND1	-2.98456	1.57589	36.7028	1.37585e-09	2.31889e-07	DOWN
CNIH2	1.0284	0.688283	36.6865	1.38737e-09	2.31889e-07	UP
GFY	2.51052	-2.12331	36.6748	1.39573e-09	2.32019e-07	UP
COL25A1	1.42266	-0.638759	36.62	1.43551e-09	2.37363e-07	UP
BEST3	2.80945	-0.255151	36.2914	1.69914e-09	2.78707e-07	UP
GJA10	3.90312	-3.14861	36.2864	1.70348e-09	2.78707e-07	UP
ITIH4	-1.71505	4.27513	36.1465	1.83029e-09	2.97887e-07	DOWN
L1TD1	-2.34006	1.69092	36.0363	1.93679e-09	3.13578e-07	DOWN
SUSD2	1.12571	3.04403	35.8333	2.14943e-09	3.46204e-07	UP
MTTP	-2.48244	1.09481	35.7752	2.21446e-09	3.54838e-07	DOWN
C6	-2.82062	3.10665	35.6785	2.32719e-09	3.7099e-07	DOWN
TSPYL6	2.61608	-3.43341	35.6365	2.37793e-09	3.77144e-07	UP
LBP	-3.40285	4.28767	35.4968	2.55468e-09	4.01085e-07	DOWN
HMX3	4.01641	-2.49471	35.4534	2.61224e-09	4.06021e-07	UP
GRIK2	1.34316	2.26161	35.3582	2.74314e-09	4.23965e-07	UP
POU3F2	3.97006	-3.3549	35.3498	2.75497e-09	4.23965e-07	UP
SLC22A1	-1.72531	0.642687	35.3259	2.78905e-09	4.26066e-07	DOWN
LMOD3	-2.56223	-0.0391947	35.321	2.79603e-09	4.26066e-07	DOWN
REG3A	7.34347	-0.477181	35.167	3.02607e-09	4.5887e-07	UP
GRIK4	1.21342	0.29148	34.809	3.63693e-09	5.45488e-07	UP
SFTPD	-2.8228	-0.031841	34.803	3.64818e-09	5.45488e-07	DOWN
TTN	-2.12654	9.48824	34.802	3.64993e-09	5.45488e-07	DOWN
OLFM3	3.36555	-1.32486	34.7569	3.73548e-09	5.55604e-07	UP
MAT1A	-2.70051	2.59273	34.652	3.94235e-09	5.83581e-07	DOWN
NLRP4	2.3603	-2.141	34.6363	3.97418e-09	5.85504e-07	UP
KLRC2	1.30054	1.04129	34.6247	3.99804e-09	5.86242e-07	UP
MYOM3	-1.5305	1.1576	34.5656	4.12129e-09	6.01476e-07	DOWN
S100A1	-2.60059	-0.869863	34.4685	4.33198e-09	6.29271e-07	DOWN
MGAT5B	1.45146	-0.707038	34.4335	4.4107e-09	6.36566e-07	UP
OR6N1	3.28173	-3.4405	34.3577	4.58593e-09	6.5695e-07	UP
SAA2	-3.31832	3.34611	34.1954	4.98471e-09	7.10802e-07	DOWN
DMBT1	2.09005	5.80462	34.0219	5.44949e-09	7.73529e-07	UP
IL17RB	1.08385	2.40642	33.9975	5.5183e-09	7.79736e-07	UP
CPB2	-4.16961	1.62043	33.882	5.85569e-09	8.2041e-07	DOWN
MEP1B	1.16087	-1.96075	33.881	5.85894e-09	8.2041e-07	UP
CFHR3	-1.90413	3.22501	33.745	6.28302e-09	8.71937e-07	DOWN
MYBPH	-4.00761	-0.581521	33.4152	7.44407e-09	1.01941e-06	DOWN
FGF9	1.40722	-0.057656	33.3619	7.65066e-09	1.04311e-06	UP
ABCG2	1.20268	4.02889	33.3107	7.85496e-09	1.06629e-06	UP
GLP1R	1.66604	-1.08457	33.2311	8.18298e-09	1.10598e-06	UP
PRSS58	5.73355	-3.36166	33.2018	8.30752e-09	1.11795e-06	UP
GAL3ST1	1.4497	-1.11208	33.1555	8.50763e-09	1.13995e-06	UP
HBG2	-3.61513	3.00278	33.1012	8.7483e-09	1.16717e-06	DOWN
C4BPA	-4.35936	2.81505	33.0202	9.12077e-09	1.21166e-06	DOWN
ANKRD1	-2.37287	2.77999	32.9869	9.2782e-09	1.22733e-06	DOWN
TARP	-2.04696	2.98627	32.8905	9.75e-09	1.27885e-06	DOWN
HAO2	-2.44702	-0.785263	32.8095	1.01645e-08	1.32762e-06	DOWN
PKD1L2	1.45486	2.2671	32.6363	1.11122e-08	1.44533e-06	UP
ALDOB	-5.38114	4.634	32.4461	1.22547e-08	1.5807e-06	DOWN
RBM46	2.28631	-1.98161	32.4255	1.23853e-08	1.59094e-06	UP
OR51E2	-2.07674	1.37079	32.146	1.43011e-08	1.82949e-06	DOWN
IL1RL1	-1.26204	3.07036	32.1206	1.44891e-08	1.84593e-06	DOWN
UNC79	1.08098	0.40691	31.9448	1.58613e-08	2.00433e-06	UP
KRT1	-3.40296	6.92147	31.6495	1.84663e-08	2.30539e-06	DOWN
CASR	-2.76427	1.28604	31.6271	1.86808e-08	2.32284e-06	DOWN
GYS2	-1.75523	-0.280097	31.5438	1.94992e-08	2.41495e-06	DOWN
MMP10	-2.05902	4.66034	31.5161	1.97796e-08	2.43995e-06	DOWN
CALB2	1.713	1.38296	31.4615	2.03434e-08	2.49958e-06	UP
GPC5	1.51604	-1.25355	31.3306	2.17628e-08	2.66345e-06	UP
SATL1	1.93656	-3.39595	31.3066	2.20326e-08	2.68591e-06	UP
SFTPA2	-4.32727	3.32785	31.2054	2.32117e-08	2.80762e-06	DOWN
SLC6A19	3.25679	0.644663	31.1085	2.43999e-08	2.9399e-06	UP
ELAVL3	2.37999	-3.37172	30.9979	2.58303e-08	3.09814e-06	UP
LOC101928595	1.26773	-3.38144	30.9918	2.59125e-08	3.09814e-06	UP
CLRN3	-2.50036	-0.893547	30.8577	2.77656e-08	3.30698e-06	DOWN
JAKMIP2	1.16103	3.10905	30.7946	2.86828e-08	3.40318e-06	UP
ST8SIA2	1.83586	-0.509654	30.7617	2.91736e-08	3.43764e-06	UP
SAA1	-2.73087	4.41777	30.667	3.06326e-08	3.57986e-06	DOWN
CHRNB4	1.45178	-0.746248	30.641	3.10467e-08	3.61467e-06	UP
DUOXA2	2.03347	3.03703	30.6079	3.15801e-08	3.66306e-06	UP
DAW1	2.14801	-1.09233	30.5391	3.27202e-08	3.78119e-06	UP
PIANP	1.32405	-2.65939	30.4282	3.46451e-08	3.98881e-06	UP
ITIH2	-3.95088	3.23335	30.3975	3.5198e-08	4.03751e-06	DOWN
HES6	1.02078	-1.54303	30.3365	3.63234e-08	4.15096e-06	UP
GLYATL1	-3.17541	-0.320317	30.3224	3.65876e-08	4.15096e-06	DOWN
CEACAM7	2.11215	2.79757	30.2942	3.71237e-08	4.19647e-06	UP
CRHBP	-1.65252	-0.513305	30.2122	3.87267e-08	4.34593e-06	DOWN
NRAP	-5.51274	2.62556	30.2053	3.88653e-08	4.34593e-06	DOWN
OR3A2	1.87632	-2.67977	29.9373	4.46249e-08	4.97208e-06	UP
CREB3L3	-3.09088	1.29759	29.8339	4.70688e-08	5.22564e-06	DOWN
MKX	1.43342	-0.554752	29.5136	5.55247e-08	6.14249e-06	UP
ORM2	-5.40143	4.48671	29.5035	5.58156e-08	6.15278e-06	DOWN
LOC392232	2.26978	-2.03881	29.4159	5.83976e-08	6.41465e-06	UP
UCHL1	1.32256	4.53614	29.4048	5.87315e-08	6.42862e-06	UP
ZNF804A	1.06937	0.88447	29.3284	6.10927e-08	6.65144e-06	UP
SFTPA1	-7.82636	2.391	29.3187	6.14015e-08	6.65144e-06	DOWN
SSTR2	1.05883	1.12259	29.3184	6.14091e-08	6.65144e-06	UP
SCGB3A2	-4.11209	0.280713	29.2249	6.4446e-08	6.95614e-06	DOWN
CYP4A11	-4.48901	0.171294	29.0466	7.0657e-08	7.58965e-06	DOWN
SCML2	1.09209	1.83983	29.0426	7.08035e-08	7.58965e-06	UP
MAS1	2.697	-2.92438	28.9242	7.52649e-08	8.04016e-06	UP
KLRC3	1.13029	0.340158	28.7809	8.10446e-08	8.59847e-06	UP
TMPRSS3	1.25044	4.0798	28.5712	9.03169e-08	9.51725e-06	UP
TTC29	2.07249	-2.73328	28.5038	9.35164e-08	9.82112e-06	UP
2022-09-03	1.07717	2.45339	28.4806	9.46401e-08	9.90566e-06	UP
OR2L13	2.04521	-2.91847	28.4609	9.56103e-08	9.97363e-06	UP
TCEAL2	1.44034	1.14488	28.2283	1.07816e-07	1.11719e-05	UP
SLC24A4	1.02716	-0.174078	28.2054	1.09099e-07	1.12673e-05	UP
TMEM145	1.13565	0.749402	28.0726	1.1685e-07	1.20278e-05	UP
KNG1	-5.04573	3.16261	27.9993	1.21361e-07	1.24509e-05	DOWN
ACTL6B	3.94875	-3.79232	27.8671	1.29941e-07	1.32874e-05	UP
MTMR7	1.52289	-0.249068	27.8504	1.31069e-07	1.33587e-05	UP
TDGF1	-3.04839	-2.36366	27.841	1.31707e-07	1.33799e-05	DOWN
ZDHHC22	2.35202	-3.973	27.7967	1.34755e-07	1.3645e-05	UP
ABCC2	1.24132	4.58435	27.6934	1.42149e-07	1.43154e-05	UP
LRRC37A8P	1.03379	-1.37789	27.6914	1.42297e-07	1.43154e-05	UP
PRH2	-3.37722	-0.647228	27.6659	1.4418e-07	1.44115e-05	DOWN
SGOL1-AS1	1.03071	-1.58508	27.546	1.534e-07	1.5284e-05	UP
LSP1P3	1.29073	-0.722836	27.5395	1.53919e-07	1.52867e-05	UP
NRCAM	1.07729	3.8514	27.5234	1.55205e-07	1.53653e-05	UP
GRIK1	1.95136	-1.32239	27.5086	1.56398e-07	1.54342e-05	UP
SLC10A6	-1.36482	1.02214	27.4854	1.58287e-07	1.55712e-05	DOWN
ARMC4	1.12202	0.214869	27.4578	1.60563e-07	1.57453e-05	UP
DMGDH	-1.2597	1.75437	27.4468	1.61477e-07	1.57852e-05	DOWN
FOXI1	2.14238	-0.871132	27.4314	1.62771e-07	1.58617e-05	UP
FGA	-5.77246	7.00837	27.3696	1.68056e-07	1.63255e-05	DOWN
UNC5A	1.47814	-1.89655	27.321	1.72332e-07	1.66585e-05	UP
PLAC4	1.90258	0.376447	27.3125	1.7309e-07	1.66585e-05	UP
KLHL41	-1.57385	2.02844	27.2572	1.78106e-07	1.70883e-05	DOWN
CDHR2	-2.41516	1.00931	27.2342	1.80245e-07	1.72403e-05	DOWN
SLITRK2	1.48814	-0.689214	27.2251	1.81095e-07	1.72685e-05	UP
UNC45B	-2.15102	-1.61648	27.2098	1.82531e-07	1.73522e-05	DOWN
GP2	-8.42962	1.73881	27.1951	1.83921e-07	1.7431e-05	DOWN
NXF3	1.31904	0.229289	27.105	1.927e-07	1.82075e-05	UP
CLIC5	1.15048	2.25476	27.0392	1.99367e-07	1.87803e-05	UP
VTN	-2.64077	2.36105	27.0228	2.01067e-07	1.88677e-05	DOWN
GPC3	1.32372	5.33308	27.0184	2.01527e-07	1.88677e-05	UP
UPB1	-1.47512	0.213134	27.0128	2.02115e-07	1.88677e-05	DOWN
GPA33	-2.07292	-0.383449	26.9693	2.06717e-07	1.92396e-05	DOWN
KCNU1	2.41346	-3.84202	26.8127	2.24162e-07	2.08009e-05	UP
CERKL	1.67239	-0.811376	26.7721	2.28919e-07	2.11163e-05	UP
MGARP	1.12513	-0.633067	26.7457	2.3207e-07	2.13436e-05	UP
LEP	2.07134	0.978792	26.6754	2.40668e-07	2.2069e-05	UP
MORN3	1.04073	0.054607	26.5895	2.51603e-07	2.30039e-05	UP
RNF17	1.60454	-0.7994	26.5681	2.54405e-07	2.31241e-05	UP
GUCA1C	2.97349	-3.94141	26.4728	2.6728e-07	2.42235e-05	UP
MUC12	-2.4231	2.77141	26.2506	2.99857e-07	2.70184e-05	DOWN
OTC	-4.17696	-0.300203	26.2374	3.0192e-07	2.71257e-05	DOWN
PEBP4	-1.95214	-1.724	26.1067	3.23058e-07	2.8858e-05	DOWN
APC2	1.1957	-2.70654	26.0802	3.27524e-07	2.91731e-05	UP
CELF3	2.43231	-2.32244	26.0631	3.30438e-07	2.93485e-05	UP
SLC8A2	1.10797	-1.2378	26.0515	3.32428e-07	2.94411e-05	UP
SOX14	4.69611	-2.63295	26.0459	3.33401e-07	2.94435e-05	UP
CYP2A6	-3.95314	0.525269	25.9711	3.46575e-07	3.05202e-05	DOWN
OR3A1	1.71392	-2.54986	25.8436	3.70221e-07	3.24188e-05	UP
LOC93432	1.52999	2.25279	25.7403	3.90595e-07	3.41068e-05	UP
DSG1	-2.65432	5.68686	25.6506	4.09164e-07	3.56282e-05	DOWN
AOX1	-1.51538	5.06863	25.642	4.10987e-07	3.5687e-05	DOWN
C8A	-6.14306	2.33905	25.5709	4.26414e-07	3.69234e-05	DOWN
FGB	-5.20388	6.74945	25.5439	4.32431e-07	3.73404e-05	DOWN
FCN2	-3.86809	-1.29271	25.4887	4.44988e-07	3.82239e-05	DOWN
NKAIN1	1.5922	-2.34122	25.4873	4.45313e-07	3.82239e-05	UP
ACTN2	-2.01716	3.46651	25.3647	4.74534e-07	4.05258e-05	DOWN
INHBC	-2.88241	-1.99202	25.196	5.17908e-07	4.40293e-05	DOWN
CFHR5	-7.27741	1.31651	25.1767	5.23111e-07	4.42616e-05	DOWN
LOC101928225	3.27278	-3.86675	25.1701	5.24884e-07	4.42616e-05	UP
AADACL3	4.776	-1.76394	25.1683	5.25399e-07	4.42616e-05	UP
CPN2	-3.89254	-0.928007	25.1339	5.3484e-07	4.48141e-05	DOWN
SYT6	1.21302	-2.48814	25.0972	5.4511e-07	4.54297e-05	UP
NXPE4	-2.4315	-1.09348	25.0386	5.61939e-07	4.67071e-05	DOWN
SYT2	1.52686	-2.38404	24.9557	5.86637e-07	4.86298e-05	UP
NXPE1	-3.8404	-1.16388	24.8669	6.14281e-07	5.06513e-05	DOWN
SLC22A10	-2.5571	-1.74165	24.8372	6.23821e-07	5.13019e-05	DOWN
NPHS1	-2.65821	-0.429714	24.8226	6.28553e-07	5.15546e-05	DOWN
SLC18A3	5.41359	-1.53973	24.8068	6.33731e-07	5.18426e-05	UP
RXRG	-2.3664	-1.41363	24.6196	6.98375e-07	5.65356e-05	DOWN
COL26A1	1.45532	-0.981155	24.6144	7.00283e-07	5.65428e-05	UP
ASGR1	-1.4689	-0.00359383	24.5187	7.35939e-07	5.92678e-05	DOWN
G6PC	-5.02876	1.38002	24.5135	7.37915e-07	5.92734e-05	DOWN
SLC10A4	1.12148	-0.855077	24.4282	7.71321e-07	6.16382e-05	UP
ANKRD30BP3	3.75843	-3.74685	24.3998	7.82767e-07	6.23925e-05	UP
NKX2-2	2.83146	-3.4299	23.9425	9.92568e-07	7.78506e-05	UP
NRG1	-1.42935	3.85232	23.9393	9.94231e-07	7.78506e-05	DOWN
MAEL	1.67574	0.0170716	23.8836	1.02343e-06	7.99352e-05	UP
IRG1	1.71374	-3.20017	23.6521	1.15421e-06	8.96998e-05	UP
CLRN1	4.00756	-2.5836	23.5781	1.19944e-06	9.29822e-05	UP
FOXN4	2.14078	-1.01031	23.5664	1.20678e-06	9.3318e-05	UP
PRLR	1.25391	3.20478	23.5388	1.22423e-06	9.42987e-05	UP
GABRA1	3.0037	-2.84991	23.5367	1.22552e-06	9.42987e-05	UP
RIT2	3.12717	-3.6929	23.4686	1.2697e-06	9.72165e-05	UP
REG4	-2.12983	0.0229137	23.4368	1.29088e-06	9.78742e-05	DOWN
HSD17B13	-1.28711	0.839665	23.292	1.39175e-06	0.000104502	DOWN
RHBDL3	1.13412	-1.0161	23.2766	1.40299e-06	0.000105093	UP
MT1A	-1.68178	0.263687	23.0594	1.57074e-06	0.000115704	DOWN
TMEFF1	1.27648	-1.6982	22.9328	1.67764e-06	0.000122421	UP
MYH1	-6.91377	6.89478	22.8884	1.71681e-06	0.000124985	DOWN
BHMT2	-1.20202	1.37249	22.8045	1.79341e-06	0.000129651	DOWN
LHX4	1.36732	-1.04019	22.7282	1.86608e-06	0.000134591	UP
MIOX	1.31626	-1.75964	22.718	1.87599e-06	0.000134993	UP
SLC25A48	1.91669	-3.40669	22.692	1.9016e-06	0.000136205	UP
MUCL1	-2.46238	2.07438	22.6862	1.90737e-06	0.000136305	DOWN
CACNA1S	-2.13729	1.28309	22.628	1.96597e-06	0.00013953	DOWN
KCNJ4	2.2063	-4.0173	22.5878	2.00754e-06	0.000142156	UP
F13B	-3.38744	-0.518452	22.5155	2.08458e-06	0.000146941	DOWN
GABRA3	1.25213	2.74717	22.4873	2.11532e-06	0.000148435	UP
MDGA2	1.74317	-0.432419	22.4803	2.1231e-06	0.000148645	UP
KLK2	-4.53526	1.72296	22.4745	2.12952e-06	0.00014876	DOWN
SERPINB10	1.72705	-2.26251	22.4653	2.13972e-06	0.000148804	UP
OIT3	-1.67795	-1.5042	22.442	2.16581e-06	0.000150034	DOWN
ASB4	1.7048	-2.58101	22.4409	2.16706e-06	0.000150034	UP
PIPOX	-1.27495	0.619793	22.41	2.20225e-06	0.000152131	DOWN
B3GAT2	2.67429	-3.66248	22.3866	2.22919e-06	0.000153311	UP
IGSF10	1.23519	4.37759	22.3211	2.30657e-06	0.000157934	UP
GCM1	-1.95707	-0.18195	22.3059	2.32493e-06	0.000158841	DOWN
OR2M2	2.58427	-3.62555	22.2128	2.44041e-06	0.000166001	UP
SLC13A5	-3.11004	0.622419	22.1764	2.4871e-06	0.000168808	DOWN
SFTPC	-10.1671	3.48973	22.1383	2.53692e-06	0.000171116	DOWN
SLC26A9	-2.0317	1.30921	22.0596	2.64314e-06	0.000177079	DOWN
RXFP2	-4.86698	-0.0549244	22.0335	2.67934e-06	0.000178734	DOWN
NEUROG2	3.03287	-3.89492	22.0008	2.72541e-06	0.00018103	UP
RDH16	-1.14066	0.613059	21.9675	2.77312e-06	0.000183807	DOWN
SERPINA5	-1.80531	0.00121438	21.9619	2.78118e-06	0.000183948	DOWN
HOXB9	1.27756	0.238518	21.9451	2.80561e-06	0.000184387	UP
FGL1	-5.2322	3.17013	21.8802	2.9022e-06	0.000190333	DOWN
KLHL1	3.09162	-2.27158	21.8616	2.9304e-06	0.000191778	UP
PLCD4	1.09768	1.05753	21.8078	3.01378e-06	0.000196144	UP
F12	-1.44324	0.956988	21.8063	3.01604e-06	0.000196144	DOWN
XIRP2	-3.05593	1.51205	21.724	3.1483e-06	0.000204318	DOWN
FAM135B	1.44607	-1.18266	21.6464	3.27819e-06	0.000212304	UP
CDHR5	-1.87611	0.00916411	21.5969	3.364e-06	0.000216957	DOWN
RTBDN	1.42164	-2.92352	21.5022	3.53429e-06	0.000226998	UP
GALNT15	-1.06403	1.62891	21.4499	3.63189e-06	0.000231829	DOWN
ACOT12	-2.28268	-1.89424	21.3412	3.84389e-06	0.00024439	DOWN
CNR1	1.0973	0.423467	21.3409	3.84439e-06	0.00024439	UP
MTUS2	1.22963	3.10485	21.2981	3.93121e-06	0.000248385	UP
GDF5	-1.73949	-1.57427	21.2493	4.03252e-06	0.000253755	DOWN
SERPINA3	-1.87099	7.13183	21.1975	4.14304e-06	0.000259136	DOWN
GPR123	2.30935	-3.97571	21.1136	4.32838e-06	0.000270185	UP
C1orf110	-2.6087	0.625692	21.0787	4.40805e-06	0.000274057	DOWN
BCL2L15	1.11872	0.758371	21.0641	4.4417e-06	0.000275598	UP
VSIG1	-1.07038	1.74924	20.9853	4.62817e-06	0.000286027	DOWN
LOC441601	1.71153	-2.88893	20.9664	4.6742e-06	0.000288298	UP
LOC100287072	1.4598	-1.83935	20.8959	4.84939e-06	0.000297547	UP
MASP2	-4.88152	-1.16523	20.8945	4.85286e-06	0.000297547	DOWN
AFM	-4.72015	0.591351	20.8839	4.87986e-06	0.000298613	DOWN
ANGPTL3	-5.38652	1.8288	20.8437	4.98322e-06	0.000303148	DOWN
GRIN3A	-2.01664	1.18202	20.8037	5.08855e-06	0.000308349	DOWN
ANKRD26P1	2.13299	-2.55924	20.7829	5.14409e-06	0.000310503	UP
GNG4	1.23722	0.389636	20.6506	5.51189e-06	0.000331589	UP
CSN3	4.46387	-1.65796	20.6102	5.62941e-06	0.00033783	UP
FTCD	-1.72562	0.815197	20.595	5.67431e-06	0.000339868	DOWN
C1orf195	1.75779	-3.59607	20.5665	5.75938e-06	0.0003443	UP
HP09025	3.91003	-4.02618	20.4925	5.98645e-06	0.000356504	UP
SMCP	2.16023	-4.05557	20.472	6.05095e-06	0.000358969	UP
CTNNA2	1.71107	-3.07669	20.4368	6.16325e-06	0.000364241	UP
GLYAT	-3.70882	-1.24706	20.4021	6.27611e-06	0.000369506	DOWN
HBG1	-3.193	0.54708	20.3534	6.43798e-06	0.000376894	DOWN
PAGE5	-2.20858	1.38908	20.3188	6.55536e-06	0.00038212	DOWN
APOA2	-4.63403	2.49953	20.3162	6.56412e-06	0.00038212	DOWN
KCNJ6	1.37445	-1.72347	20.3035	6.608e-06	0.000383955	UP
SIX6	2.85108	-4.04006	20.2995	6.62174e-06	0.000384036	UP
OR2M1P	2.76967	-3.51901	20.2675	6.73333e-06	0.000389056	UP
FCN3	-1.13757	-0.263634	20.2419	6.82435e-06	0.000391635	DOWN
SLC5A11	1.17169	-1.39396	20.2407	6.82832e-06	0.000391635	UP
HHATL	-2.2684	-2.17081	20.1716	7.0798e-06	0.000403821	DOWN
CRLF1	-1.29306	1.51951	20.1631	7.11106e-06	0.000404862	DOWN
CES1P1	-2.77331	-0.812935	20.1224	7.26424e-06	0.000411323	DOWN
INSM2	1.84839	-4.00456	20.0327	7.61284e-06	0.000427944	UP
SLC38A11	-1.0362	2.24125	19.9932	7.77197e-06	0.000434532	DOWN
KLK4	-2.79583	2.38481	19.9723	7.8572e-06	0.000438508	DOWN
CYP19A1	-1.69638	0.965133	19.9649	7.88776e-06	0.000439425	DOWN
CCL16	-1.86968	-2.44495	19.9142	8.09973e-06	0.000450426	DOWN
UROC1	-2.78336	-1.3864	19.867	8.30213e-06	0.000460035	DOWN
SERPINA6	-3.63109	1.52864	19.8198	8.5096e-06	0.000470693	DOWN
ARSE	-1.09638	1.89127	19.81	8.55335e-06	0.000471435	DOWN
PCK1	-2.75028	2.59202	19.8065	8.56889e-06	0.000471456	DOWN
CFHR2	-7.58048	2.47372	19.7684	8.74156e-06	0.000480106	DOWN
SERPINA4	-3.02328	0.971657	19.7624	8.76911e-06	0.00048077	DOWN
LINC00452	2.33486	-4.03879	19.7582	8.78816e-06	0.000480966	UP
SCRT1	1.95495	-4.28933	19.7338	8.90151e-06	0.00048546	UP
AQP4	-2.83049	0.199	19.6376	9.36079e-06	0.000507835	DOWN
CYP2F1	3.24861	-0.530469	19.6004	9.54468e-06	0.00051601	UP
SMIM18	2.45896	-4.03493	19.5723	9.68645e-06	0.000520211	UP
NKAIN4	-2.00224	-1.65326	19.4759	1.01879e-05	0.000543679	DOWN
RELN	1.1992	5.06092	19.3747	1.07422e-05	0.000571802	UP
OLFM1	-1.02937	2.19555	19.3673	1.07836e-05	0.000572537	DOWN
LAIR2	-1.65308	-0.760677	19.3204	1.10521e-05	0.000583305	DOWN
BAAT	-2.42794	1.67238	19.2928	1.12129e-05	0.000586794	DOWN
ST18	1.22084	1.15865	19.2682	1.13585e-05	0.000592435	UP
ADCYAP1R1	1.06672	-0.626851	19.2477	1.1481e-05	0.000597136	UP
SH2D6	1.64743	-3.92189	19.1761	1.19197e-05	0.000612775	UP
PROKR2	2.04225	-1.89597	19.1276	1.22262e-05	0.00062717	UP
GABRB2	1.19854	0.113608	19.0465	1.27571e-05	0.000647268	UP
KCNB2	1.59829	-0.314671	19.0455	1.27638e-05	0.000647268	UP
CLDN18	-4.16215	-0.0211898	19.0299	1.28683e-05	0.000650625	DOWN
FGG	-4.33604	6.18749	19.0115	1.29933e-05	0.000654634	DOWN
ERVFRD-1	-1.43978	-0.988176	18.9891	1.3147e-05	0.000659776	DOWN
NTRK2	-1.32644	5.14392	18.9888	1.31486e-05	0.000659776	DOWN
DEFA5	5.28237	-2.57202	18.9598	1.33501e-05	0.000666135	UP
APOH	-6.13886	2.79076	18.8944	1.38156e-05	0.000686056	DOWN
C1orf111	3.48814	-4.05019	18.8908	1.38416e-05	0.000686252	UP
TCAP	-1.40924	-0.829254	18.8753	1.39549e-05	0.000690769	DOWN
NOL4	1.40744	-0.212796	18.8257	1.43221e-05	0.000704455	UP
DDC	-3.24747	0.368451	18.7995	1.45205e-05	0.000710843	DOWN
NPY4R	1.80948	-4.1718	18.7802	1.46684e-05	0.000715825	UP
BOD1L2	2.11699	-4.14507	18.7603	1.48219e-05	0.000722186	UP
CCDC54	2.07694	-3.90619	18.6709	1.55334e-05	0.000750968	UP
SOX7	-1.02041	0.700922	18.6619	1.56066e-05	0.000753335	DOWN
CXCL9	1.12379	4.63729	18.5748	1.63363e-05	0.000785688	UP
GCGR	-1.56627	-0.999251	18.5641	1.64285e-05	0.00078811	DOWN
CA4	1.31666	1.95338	18.5189	1.68226e-05	0.000805774	UP
DPF1	1.037	-0.920247	18.4339	1.759e-05	0.000831008	UP
AHSG	-5.7824	1.46958	18.3829	1.80676e-05	0.000852277	DOWN
MMRN1	-1.03295	3.26563	18.3653	1.82346e-05	0.000858848	DOWN
RFPL4B	1.96215	-2.97615	18.356	1.83242e-05	0.000861158	UP
CYP8B1	-5.60102	-0.41672	18.3454	1.84259e-05	0.000863933	DOWN
MAGEC1	2.0438	2.37913	18.34	1.84787e-05	0.000865103	UP
HSD17B1	1.1264	2.00545	18.2843	1.90269e-05	0.000884444	UP
HTR3E	1.67214	-2.806	18.2836	1.90341e-05	0.000884444	UP
KCTD8	1.57662	-3.00381	18.2571	1.93002e-05	0.000895472	UP
IL36G	-1.92262	0.0411864	18.2516	1.93562e-05	0.000896733	DOWN
C1orf192	1.70402	-1.12913	18.1647	2.02599e-05	0.00093442	UP
GRIN2A	-1.42174	1.91164	18.0822	2.11565e-05	0.00097145	DOWN
ACSM2B	-4.72936	-0.307314	18.0274	2.17743e-05	0.000996639	DOWN
GPR12	1.88193	-2.66062	18.0206	2.1853e-05	0.000996639	UP
MEDAG	-1.10148	2.54993	18.0195	2.18654e-05	0.000996639	DOWN
DPY19L2P1	1.19824	-0.476816	17.9378	2.2824e-05	0.00103427	UP
LYPD2	2.04706	-0.186817	17.911	2.31478e-05	0.00104589	UP
DNASE1L3	-1.22812	1.7555	17.9003	2.3279e-05	0.00105029	DOWN
L1CAM	1.34736	4.84781	17.8638	2.37297e-05	0.00106753	UP
FBN3	1.90455	-0.816657	17.8335	2.41106e-05	0.00108153	UP
ZIM3	1.91254	-4.23473	17.8262	2.42033e-05	0.00108413	UP
SALL1	-1.06862	3.67301	17.7696	2.49334e-05	0.00111202	DOWN
MT1M	-1.2529	1.79639	17.686	2.60538e-05	0.00115536	DOWN
OR9Q2	2.36382	-3.37862	17.6627	2.63749e-05	0.00116769	UP
EPHA6	1.16551	1.3403	17.6562	2.64655e-05	0.00116862	UP
PRSS1	-2.36669	4.19258	17.6477	2.65837e-05	0.00117217	DOWN
PLEKHG4B	1.1842	3.79943	17.6424	2.66572e-05	0.00117375	UP
PAX8	-1.93941	3.63643	17.5542	2.79238e-05	0.00121574	DOWN
AARD	1.35395	-2.72347	17.5479	2.80155e-05	0.00121803	UP
GALNT9	2.05013	-3.52196	17.5412	2.8115e-05	0.00121959	UP
HAO1	-5.83495	-0.428243	17.5232	2.83821e-05	0.00122881	DOWN
MYPN	1.71947	3.9223	17.5009	2.87175e-05	0.0012416	UP
MAP7D2	1.13178	2.3924	17.4665	2.92411e-05	0.00125885	UP
IGFALS	-1.64114	-2.26303	17.4357	2.97192e-05	0.00127252	DOWN
SCGN	-3.50776	-1.73914	17.4033	3.02299e-05	0.00129083	DOWN
HIF3A	1.01884	1.59184	17.3962	3.03438e-05	0.00129392	UP
MYOZ2	-1.2503	-1.13054	17.3307	3.14065e-05	0.00133011	DOWN
CYP17A1	1.88339	-1.38735	17.2821	3.22211e-05	0.00135538	UP
NKX2-4	3.02536	-4.14316	17.2743	3.23537e-05	0.00135728	UP
TGM1	-1.14766	4.24616	17.2474	3.2814e-05	0.0013692	DOWN
HFE2	-4.28264	-0.903538	17.2252	3.31997e-05	0.00138159	DOWN
MIA2	-1.69901	0.873072	17.1702	3.41751e-05	0.00141068	DOWN
APOA4	-6.02638	0.918651	17.1478	3.45806e-05	0.00142192	DOWN
LCN10	-1.29194	-2.06392	17.1146	3.51907e-05	0.00144236	DOWN
DOC2A	-1.32043	1.60058	17.1132	3.52169e-05	0.00144236	DOWN
KRT79	-2.03171	2.5173	17.0289	3.68149e-05	0.0014999	DOWN
MYF5	2.98216	-3.9453	16.9822	3.77316e-05	0.00153324	UP
ANKRD20A19P	-3.06291	-1.56056	16.9781	3.78135e-05	0.00153456	DOWN
PHACTR3	1.03775	-0.186421	16.97	3.79743e-05	0.00153907	UP
CACNA1E	1.11607	1.02308	16.9635	3.8106e-05	0.0015424	UP
CD5L	-2.65916	-2.19381	16.9363	3.86562e-05	0.00155656	DOWN
IL5RA	-1.32915	-0.0270597	16.9115	3.91633e-05	0.00157291	DOWN
MMP7	-1.42258	6.03967	16.9033	3.93322e-05	0.00157765	DOWN
F5	-1.02859	7.47572	16.8722	3.99834e-05	0.00159848	DOWN
TM4SF5	-3.88732	-1.89367	16.8696	4.00369e-05	0.00159848	DOWN
CHRNA2	-3.08068	-2.12028	16.8449	4.05627e-05	0.00161244	DOWN
TRDN	-2.73486	0.962098	16.7224	4.32682e-05	0.00170258	DOWN
VIL1	-2.40409	1.48166	16.6957	4.38808e-05	0.00172232	DOWN
APOC3	-6.48894	3.01069	16.6648	4.46016e-05	0.0017462	DOWN
KCNJ1	-1.27438	-0.815869	16.6294	4.54415e-05	0.00177103	DOWN
AGXT2	-4.16001	-0.259847	16.6014	4.61178e-05	0.00179427	DOWN
MTNR1B	1.96453	-0.128656	16.5586	4.71691e-05	0.00183058	UP
MYH6	1.15122	-0.651179	16.5305	4.78727e-05	0.00184866	UP
CP	-1.45394	7.3547	16.4619	4.96378e-05	0.00190734	DOWN
SLC25A47	-4.70372	-2.34116	16.4565	4.97789e-05	0.0019104	DOWN
SLC22A3	-1.07652	3.60425	16.4531	4.98693e-05	0.00191151	DOWN
EMILIN3	1.02054	-2.12921	16.4053	5.1143e-05	0.00194525	UP
GIF	-6.37225	-1.10621	16.3323	5.31502e-05	0.00201491	DOWN
CPN1	-4.36876	-0.977618	16.3063	5.38858e-05	0.00203535	DOWN
SLC4A1	-1.71982	1.62744	16.2739	5.48135e-05	0.00206287	DOWN
TMEM151B	1.62428	-3.75597	16.2009	5.69675e-05	0.00213594	UP
PLA2G2A	-1.47456	6.56759	16.193	5.72048e-05	0.00213991	DOWN
ABCG8	-2.3883	0.00297712	16.1901	5.72935e-05	0.00214066	DOWN
PPBP	1.22015	1.75033	16.1397	5.88392e-05	0.00219314	UP
CYP2C8	-1.29304	2.74611	16.1112	5.97285e-05	0.00222362	DOWN
A1CF	-3.61462	0.463624	16.1047	5.99342e-05	0.0022286	DOWN
CHRNA1	1.14245	1.0243	16.0973	6.01713e-05	0.00223208	UP
CRNN	2.31843	-0.416091	16.0449	6.18582e-05	0.00229173	UP
CEACAM20	1.44851	-2.4434	16.0354	6.21691e-05	0.00229796	UP
RALYL	1.90692	-2.19808	16.0104	6.29949e-05	0.00232021	UP
KRT5	-1.6358	10.8082	15.9909	6.36462e-05	0.00233866	DOWN
TNNI1	-3.2962	-1.42338	15.9316	6.56729e-05	0.00239895	DOWN
SLC2A2	-4.55913	1.8052	15.8562	6.83434e-05	0.00248482	DOWN
FLRT1	1.09901	-3.19558	15.8239	6.95185e-05	0.00252165	UP
ACSM2A	-4.12995	-0.331007	15.8187	6.97086e-05	0.00252403	DOWN
ENPP3	-1.04432	1.05744	15.8117	6.99679e-05	0.0025291	DOWN
SHISA3	-1.57753	-0.610501	15.7907	7.07503e-05	0.00255441	DOWN
ADH1B	-1.23788	5.51221	15.7785	7.12063e-05	0.00256491	DOWN
CDHR1	-1.18031	2.79847	15.7711	7.14867e-05	0.00257203	DOWN
HSPB3	-1.62497	0.177263	15.7519	7.22146e-05	0.00258923	DOWN
POU4F2	2.24261	-4.26484	15.7263	7.32e-05	0.00261129	UP
PRG4	-1.59245	5.41814	15.725	7.32498e-05	0.00261129	DOWN
TRPM8	-1.66096	-0.246167	15.7092	7.38657e-05	0.00262722	DOWN
LOC728739	1.18367	-3.17137	15.7055	7.40076e-05	0.00262926	UP
GDPD4	-2.14073	-2.44538	15.6246	7.72432e-05	0.00273172	DOWN
NWD1	-1.31338	0.896903	15.6119	7.77633e-05	0.00274699	DOWN
IMPG1	2.14567	-3.69701	15.5985	7.83152e-05	0.00275755	UP
NEB	-1.18244	8.33318	15.5553	8.01281e-05	0.00280502	DOWN
BTBD17	2.73479	-4.22316	15.4835	8.32281e-05	0.00289399	UP
OR2M3	1.74161	-3.3396	15.4224	8.59639e-05	0.0029758	UP
KIF12	-1.33689	0.800692	15.3694	8.84079e-05	0.0030401	DOWN
GSTA1	-1.60151	4.93655	15.3483	8.94029e-05	0.0030574	DOWN
DAZL	-1.83854	-0.103604	15.2947	9.19718e-05	0.00312122	DOWN
S100A3	-1.00691	-0.293812	15.2827	9.25587e-05	0.00312131	DOWN
OR10AD1	2.6414	-4.04789	15.2827	9.25623e-05	0.00312131	UP
MYO1A	-1.00062	0.464918	15.2719	9.30889e-05	0.00313517	DOWN
PHF21B	1.25263	-2.68206	15.2507	9.41401e-05	0.00316144	UP
PAGE1	3.88554	-2.16099	15.2265	9.53542e-05	0.00319072	UP
NECAB1	1.52236	-1.05123	15.2242	9.54727e-05	0.00319125	UP
ELANE	-1.3517	-2.55215	15.1619	9.86756e-05	0.00328419	DOWN
UGT3A1	-3.2228	-0.894264	15.1545	9.90634e-05	0.00329005	DOWN
NEUROD6	3.82794	-3.85405	15.0697	0.000103615	0.00340844	UP
NAT8	-2.25018	-2.12996	15.0434	0.000105068	0.00343913	DOWN
CXorf67	1.13013	-0.88523	15.0336	0.000105617	0.00344874	UP
MYOZ1	-1.19449	-0.0451917	15.016	0.000106603	0.0034773	DOWN
SLC7A3	1.12969	-1.52986	15.0029	0.000107347	0.00349059	UP
SLC39A5	-1.54535	-2.00628	14.9831	0.000108478	0.00351422	DOWN
GRIN2B	-1.60529	1.02621	14.9798	0.000108668	0.00351422	DOWN
OR6N2	2.30956	-3.95301	14.9508	0.000110352	0.00355482	UP
MAGEC2	2.37078	-0.332299	14.9488	0.000110468	0.00355486	UP
MYOT	-1.78503	1.13374	14.9406	0.000110951	0.00356305	DOWN
STAB2	-1.44163	2.45814	14.9072	0.00011293	0.0036191	DOWN
IL11	-1.07183	-0.575892	14.8993	0.000113407	0.00363066	DOWN
CFAP221	-1.15389	1.08786	14.8783	0.000114674	0.00366745	DOWN
BCHE	1.01178	2.04466	14.8703	0.000115162	0.00367926	UP
LINC00639	1.33856	-4.03625	14.7937	0.000119937	0.00380058	UP
PSG3	-3.88928	0.144461	14.7837	0.000120576	0.00381305	DOWN
SYNPO2L	-1.5724	-1.82086	14.7565	0.000122328	0.00386001	DOWN
OR5B12	-1.73893	-3.43295	14.7548	0.000122433	0.00386001	DOWN
OPRD1	2.0922	-3.73154	14.7374	0.000123569	0.00388063	UP
ALAS2	-1.8241	1.26493	14.7003	0.000126028	0.00394565	DOWN
OR5H15	2.4561	-4.14042	14.6964	0.000126285	0.00394565	UP
XKR7	1.63172	-3.36664	14.6881	0.000126845	0.00395895	UP
NRXN1	1.13433	1.17366	14.6527	0.000129248	0.00402678	UP
PROZ	-3.76367	-2.14934	14.6483	0.000129553	0.00403131	DOWN
DPCR1	-1.47616	0.764867	14.6272	0.000131008	0.00406845	DOWN
NR1I2	-1.30613	-0.767945	14.6061	0.000132484	0.00408166	DOWN
KCNF1	1.25421	-1.14335	14.5762	0.000134605	0.00413328	UP
KRT81	-1.57296	1.35283	14.572	0.000134902	0.00413328	DOWN
KRT74	-1.86266	-1.06951	14.5713	0.000134957	0.00413328	DOWN
BRS3	1.86601	-3.47626	14.5519	0.000136351	0.00415127	UP
MMD2	2.23001	-4.15023	14.5505	0.000136449	0.00415127	UP
SVOP	1.7449	-3.78138	14.5496	0.000136517	0.00415127	UP
ODAM	1.3861	0.682519	14.5467	0.00013673	0.00415127	UP
OR1S1	2.04416	-3.36841	14.5392	0.00013727	0.00416309	UP
PCSK2	1.36054	-1.70836	14.5353	0.00013756	0.00416376	UP
SLC22A7	-5.26876	-1.89624	14.5223	0.000138512	0.00418444	DOWN
OR6K3	2.2073	-3.46622	14.5057	0.000139739	0.00420514	UP
SLC17A1	-2.97662	-1.47571	14.4772	0.000141866	0.00426091	DOWN
CUX2	-1.37769	-0.457152	14.4703	0.00014239	0.00426839	DOWN
CCL14	-1.01644	0.53176	14.4263	0.000145755	0.00435666	DOWN
KCNJ16	-2.6363	1.15208	14.4048	0.000147428	0.00439958	DOWN
KIRREL3	1.0257	-1.79339	14.3989	0.000147888	0.0044077	UP
CCBE1	-1.113	1.68538	14.3888	0.000148681	0.00442182	DOWN
PGLYRP2	-2.04934	-1.99181	14.3691	0.000150246	0.00444813	DOWN
PTX4	1.18861	-3.92919	14.3284	0.000153528	0.00452378	UP
MSMP	1.0854	-3.88555	14.3021	0.000155693	0.00456163	UP
PRKAG3	-1.95328	-1.52705	14.2844	0.000157162	0.00459167	DOWN
C1orf168	-1.36423	-0.0416697	14.2651	0.000158785	0.00463473	DOWN
TCP11X2	2.18511	-3.83541	14.263	0.000158959	0.00463546	UP
C5orf27	-2.30419	-3.50651	14.259	0.000159295	0.00463664	DOWN
UGT2B10	-3.76793	-0.193848	14.1916	0.000165102	0.00478766	DOWN
CKM	-1.9844	1.99559	14.1757	0.000166504	0.00481931	DOWN
NLRP11	1.15159	-2.53821	14.1361	0.000170049	0.00489457	UP
OR6X1	2.76914	-4.21527	14.0999	0.000173353	0.00496669	UP
VSNL1	-1.24227	1.9162	14.0885	0.000174404	0.00498685	DOWN
LOC100130698	1.81194	-3.41373	13.9468	0.000188059	0.0052905	UP
PSG1	2.52157	0.0868512	13.9089	0.000191893	0.00537887	UP
LINC00636	2.02386	-3.85893	13.8942	0.000193391	0.00540801	UP
TBATA	-3.43068	-3.61743	13.8771	0.000195162	0.00544109	DOWN
LRRC19	-3.22567	-2.18531	13.8543	0.000197548	0.00549283	DOWN
TMEFF2	-2.18991	2.36487	13.795	0.000203881	0.00561369	DOWN
RPTN	1.50972	2.41705	13.7116	0.00021314	0.00581708	UP
HNF4A	-1.69193	1.32014	13.7062	0.000213746	0.00582852	DOWN
TCEAL6	1.26328	-3.13804	13.6824	0.000216474	0.00589356	UP
SLCO1B1	-2.29558	2.14499	13.6821	0.000216511	0.00589356	DOWN
LTF	-1.51277	4.96225	13.6729	0.000217577	0.00590251	DOWN
SLC22A9	-2.39038	-2.54438	13.6642	0.000218582	0.0059235	DOWN
MUC5AC	1.67496	6.4753	13.6611	0.000218944	0.0059235	UP
ARL14EPL	1.60968	-3.22273	13.6491	0.000220341	0.00595094	UP
EYS	-1.61126	1.37021	13.6165	0.000224211	0.0060502	DOWN
ATP13A5-AS1	1.86164	-4.07742	13.6146	0.000224429	0.00605083	UP
POTEJ	-1.57146	-1.17891	13.5993	0.000226266	0.00608979	DOWN
ELAVL2	1.10008	1.01481	13.5774	0.000228931	0.00614554	UP
MUC3A	-1.11056	5.3979	13.5547	0.000231711	0.00620758	DOWN
CLDN8	1.30631	-0.531772	13.5371	0.000233889	0.00625165	UP
CGA	-3.33343	1.01221	13.4856	0.000240407	0.00638199	DOWN
ARPP21	-2.02054	-1.60973	13.4728	0.000242047	0.00642002	DOWN
KRT2	-1.79725	0.408718	13.466	0.00024293	0.00643795	DOWN
LGI1	-1.44177	-0.336504	13.4625	0.000243374	0.00643874	DOWN
C8G	-1.19347	-2.14733	13.4484	0.00024522	0.00647106	DOWN
PROC	-1.04694	0.933741	13.4168	0.000249375	0.00656399	DOWN
SCN10A	-2.9041	-2.18735	13.3578	0.000257354	0.00672842	DOWN
AGXT	-3.51212	1.14976	13.2985	0.000265619	0.00685801	DOWN
MB	-1.67699	0.634765	13.2768	0.000268715	0.00692068	DOWN
FCER2	-1.4124	0.268696	13.2196	0.00027704	0.0070823	DOWN
TRIM54	-2.09158	-2.03763	13.1697	0.000284513	0.00722015	DOWN
NOS2	1.01727	1.82741	13.1488	0.000287704	0.0072653	UP
CYP4A22	-1.29798	-2.12532	13.1184	0.000292416	0.00736496	DOWN
RFX6	-1.64214	-0.196957	13.1019	0.000294995	0.00740131	DOWN
C1orf64	1.63589	-4.16981	13.0999	0.000295313	0.00740331	UP
SLC38A3	-1.32046	0.442106	13.0788	0.000298651	0.00746292	DOWN
OR2M5	2.08231	-3.51629	13.0726	0.000299644	0.00748172	UP
ANGPT4	-1.5943	-1.37116	13.0615	0.000301434	0.00751434	DOWN
C1QL4	1.61157	-3.56659	13.031	0.000306374	0.00759301	UP
TRHR	2.33717	-3.83881	13.0064	0.000310427	0.00766476	UP
PLA2G12B	-3.34767	-3.06828	12.9988	0.000311698	0.00769004	DOWN
GIMD1	2.81565	-4.22905	12.9887	0.000313369	0.0077129	UP
DKFZP434L187	2.0606	-4.15673	12.9856	0.000313889	0.00771348	UP
ASPG	-1.12118	-0.480275	12.9677	0.000316917	0.00776896	DOWN
CLEC4G	-1.21024	-0.75122	12.9635	0.000317625	0.00777456	DOWN
MYT1L	2.15357	-1.54913	12.9073	0.000327301	0.00795502	UP
HSPB6	-1.01301	1.25888	12.8994	0.000328681	0.00796987	DOWN
PKLR	-1.43807	-1.70063	12.8856	0.000331127	0.0080042	DOWN
NOS1	-1.41712	-0.548293	12.8839	0.000331414	0.00800491	DOWN
ALDH1L1	-1.07214	4.76535	12.8798	0.000332152	0.00801651	DOWN
IFNG	1.0106	-1.85373	12.8652	0.00033475	0.00806669	UP
SYCE1	1.26081	-1.10994	12.8389	0.000339495	0.00814316	UP
LHX2	1.17892	-1.47922	12.8319	0.000340768	0.00816739	UP
KIAA1324	-1.08862	3.64307	12.8291	0.000341278	0.00817332	DOWN
TMPRSS6	-1.30253	0.396546	12.7854	0.000349332	0.00833409	DOWN
PNLIPRP2	2.18549	-3.82195	12.7564	0.000354785	0.00843829	UP
TBX10	-2.25517	-3.61049	12.7492	0.000356154	0.00846437	DOWN
CA1	-1.69649	1.43452	12.7347	0.000358925	0.00851071	DOWN
SERPINA10	-6.61014	1.13142	12.7249	0.000360812	0.00853018	DOWN
STMN4	1.07624	-3.23554	12.7248	0.000360844	0.00853018	UP
NAT8L	1.06135	-2.36351	12.7135	0.000363017	0.00856852	UP
APOF	-5.27375	-0.223841	12.7113	0.000363458	0.00857242	DOWN
HBD	-1.53353	-0.342171	12.6458	0.00037641	0.008834	DOWN
AMBP	-3.07198	2.94937	12.6217	0.0003813	0.00892126	DOWN
TSPY3	5.36734	-3.37889	12.6198	0.000381692	0.00892126	UP
SHISA6	-1.01702	-0.839945	12.6136	0.000382946	0.00893712	DOWN
C19orf80	-2.40293	-3.28722	12.6052	0.000384675	0.00897076	DOWN
CLDN2	-2.23979	-0.130608	12.5721	0.000391548	0.00908334	DOWN
MS4A8	-2.22581	1.24572	12.5686	0.000392284	0.00909362	DOWN
RBFOX1	1.77109	-2.18478	12.4998	0.000406995	0.00939958	UP
GFAP	1.55922	-2.0394	12.4555	0.000416753	0.00957916	UP
CACNA1B	1.1895	1.88659	12.4548	0.000416927	0.00957916	UP
CRHR1	1.67197	-3.93246	12.4378	0.000420723	0.00963077	UP
MUC15	1.06796	2.68164	12.4192	0.000424943	0.0096917	UP
B3GALT1	1.17111	-3.21085	12.4175	0.000425331	0.00969344	UP
TMEM252	-2.6151	-2.93265	12.3963	0.000430186	0.00978973	DOWN
TTC36	-1.50912	-3.18424	12.3827	0.000433336	0.00981112	DOWN
SOST	-2.31782	-2.3227	12.3784	0.000434325	0.00981921	DOWN
NDST4	1.30868	-1.32508	12.3732	0.000435541	0.00983956	UP
LY6G6D	1.80182	-3.99763	12.3674	0.000436905	0.00985329	UP
CDH16	-2.86907	0.113125	12.364	0.000437691	0.00985946	DOWN
SLC17A2	-4.7996	-1.37957	12.3341	0.000444749	0.00998949	DOWN
AMER2	1.697	-3.37813	12.3236	0.000447272	0.0100345	UP
AFP	-3.797	2.76192	12.314	0.000449585	0.0100763	DOWN
KRT77	-2.11811	1.29461	12.3057	0.000451587	0.010113	DOWN
DDX25	1.21707	-1.93581	12.2921	0.000454884	0.0101657	UP
SLC5A2	-1.09527	-2.10897	12.2463	0.000466171	0.0103584	DOWN
MC4R	1.16876	-1.61975	12.2442	0.000466699	0.0103627	UP
AGTR2	-2.34636	-1.34642	12.2296	0.000470365	0.0104072	DOWN
LOC100129138	1.19876	-2.72495	12.2285	0.000470662	0.0104072	UP
BNC1	-1.63884	3.38689	12.2244	0.000471678	0.0104138	DOWN
HELT	1.60985	-4.20562	12.2173	0.000473477	0.0104239	UP
SERPINA11	-2.87455	0.0847439	12.1949	0.000479197	0.0105274	DOWN
MAP3K15	1.00849	-1.61978	12.1931	0.000479663	0.0105276	UP
SLC51B	-1.34924	-3.3977	12.1922	0.000479903	0.0105276	DOWN
RIMBP3B	-1.6495	-3.94856	12.121	0.000498559	0.0108531	DOWN
LINC01314	1.84385	-3.9452	12.0946	0.000505681	0.0109621	UP
NPSR1	-5.31571	-0.802999	12.0784	0.000510107	0.0110119	DOWN
CHAD	-1.49634	-3.11602	12.0765	0.000510614	0.0110152	DOWN
PSG2	-4.53924	0.0202306	12.0567	0.000516075	0.0111022	DOWN
GBP7	-1.25739	-0.904246	12.0541	0.000516799	0.0111101	DOWN
IL20RB	-1.11264	3.46575	12.0512	0.000517588	0.0111117	DOWN
FREM2	1.01461	7.08465	12.0496	0.000518039	0.0111137	UP
LOC102723352	1.1354	-4.08347	12.0309	0.000523245	0.0111868	UP
SLC10A2	2.44799	-0.585486	12.0066	0.000530134	0.0112836	UP
CDC20B	1.22887	-1.81484	12.0008	0.000531767	0.0112836	UP
ABRA	-1.51128	-3.34751	11.962	0.000542973	0.0114657	DOWN
TFF3	-1.33356	0.594029	11.9492	0.000546719	0.0115218	DOWN
OTX2	2.21465	-2.07894	11.9291	0.000552634	0.0115727	UP
APOBEC2	-3.17868	-2.33404	11.9035	0.000560292	0.0116973	DOWN
LOC400553	-1.39828	-3.71674	11.883	0.000566495	0.0117839	DOWN
SAA4	-3.44135	-2.41702	11.8822	0.000566715	0.0117839	DOWN
HORMAD2	-1.47154	-3.52913	11.8572	0.000574376	0.0118875	DOWN
ZNF679	1.99258	-1.68415	11.8431	0.000578752	0.0119542	UP
CADM2	1.01285	-0.159419	11.8255	0.000584238	0.0120247	UP
MEIS1-AS3	-1.10804	-4.27639	11.8179	0.000586625	0.0120607	DOWN
CLEC1B	-2.20243	-2.68348	11.7774	0.000599541	0.0122577	DOWN
FAM151A	-2.30308	-1.7696	11.7761	0.000599953	0.0122577	DOWN
MUC2	-1.54885	8.34298	11.7669	0.000602936	0.0122985	DOWN
C15orf32	1.69163	-4.26356	11.7627	0.000604295	0.0123181	UP
GSTA2	-1.70668	1.0416	11.749	0.000608761	0.0123605	DOWN
ACMSD	-2.51376	-0.385532	11.7306	0.000614818	0.0124591	DOWN
PRODH2	-3.44954	-2.95226	11.7018	0.000624402	0.012604	DOWN
CDX1	-1.53242	-3.06173	11.6944	0.000626884	0.0126051	DOWN
PRTN3	-2.4749	-3.66884	11.645	0.00064374	0.0128773	DOWN
MUC7	-5.43428	1.29407	11.6429	0.000644481	0.0128838	DOWN
SPATA31C2	-1.40089	-1.80564	11.6181	0.000653126	0.0130065	DOWN
SCTR	-2.44499	-0.91999	11.6004	0.000659364	0.0130888	DOWN
OR5H6	1.89591	-3.66596	11.595	0.000661299	0.0131104	UP
SBK2	2.14348	-4.14295	11.5598	0.00067392	0.0133097	UP
IL17REL	-1.80317	-2.5306	11.523	0.000687418	0.0134991	DOWN
PON1	-1.78899	1.723	11.4532	0.00071372	0.0139102	DOWN
SERPINB12	-2.49583	-0.686002	11.3726	0.000745344	0.0144001	DOWN
KANK4	-1.14696	1.65291	11.3615	0.000749815	0.0144506	DOWN
CDH20	-1.08223	-1.56428	11.3479	0.000755319	0.0145027	DOWN
TNNC2	-1.1488	-0.400377	11.3235	0.000765323	0.0146405	DOWN
HIST1H2BA	2.22339	-3.86082	11.3204	0.000766621	0.0146563	UP
PI3	-1.54515	4.97313	11.3134	0.000769488	0.014666	DOWN
SULT1E1	1.12134	3.57049	11.2926	0.000778146	0.0147951	UP
DNER	-1.38609	0.94249	11.248	0.000797083	0.0150902	DOWN
CRHR2	-1.60531	-2.35416	11.2189	0.000809694	0.0152917	DOWN
CPLX4	1.11411	-4.22682	11.183	0.000825501	0.0154875	UP
C21orf62	-1.79631	-2.84168	11.1747	0.000829216	0.0155359	DOWN
SLC28A2	-2.09907	0.994886	11.1437	0.000843154	0.0157419	DOWN
SLC34A1	-1.57874	-2.351	11.1411	0.000844338	0.0157546	DOWN
IQCJ	-1.40185	-1.35214	11.1059	0.000860554	0.0159867	DOWN
TCN1	-1.29207	5.8003	11.1029	0.000861923	0.0159867	DOWN
CRYGD	2.12267	-4.12502	11.0979	0.000864269	0.0160107	UP
SCHIP1	1.0548	-2.14329	11.0472	0.000888232	0.016377	UP
IRX6	-1.62631	-1.82586	11.023	0.000899906	0.0165627	DOWN
TNNT3	-1.26672	6.23601	10.9809	0.000920575	0.0168236	DOWN
SLC47A2	-2.01822	-0.561296	10.9751	0.000923457	0.0168565	DOWN
KNDC1	-1.03754	-0.441009	10.9299	0.000946271	0.0171496	DOWN
FLJ20518	2.19288	-4.06773	10.9263	0.000948083	0.0171549	UP
OR10J3	2.35336	-3.7719	10.9081	0.00095746	0.0172416	UP
SERPINB13	-1.48799	3.63184	10.9076	0.000957717	0.0172416	DOWN
KRT24	-1.99027	0.764209	10.8919	0.000965834	0.0173549	DOWN
C5orf52	-1.21775	-4.2611	10.8901	0.000966814	0.0173624	DOWN
LINC01205	2.26689	-3.36904	10.8675	0.000978672	0.0175147	UP
TAS1R1	1.01054	-2.66203	10.811	0.001009	0.0179234	UP
POM121L1P	-2.16289	-3.92709	10.8066	0.00101141	0.0179455	DOWN
LECT2	-5.88682	-2.16143	10.7966	0.00101689	0.0180101	DOWN
UNC93A	2.08202	-2.15846	10.7364	0.00105049	0.0184078	UP
ADAM2	1.64817	-0.941831	10.6977	0.00107269	0.0187229	UP
CSN2	2.71402	-4.0099	10.6931	0.00107535	0.0187378	UP
KIR3DL1	1.25468	-2.4293	10.6348	0.00110981	0.0191771	UP
LIN28A	2.54445	-4.04462	10.624	0.0011163	0.0192571	UP
EPB42	-1.66104	-1.22351	10.6106	0.00112439	0.0193217	DOWN
WTAPP1	-1.15716	-3.17195	10.5537	0.00115959	0.0198169	DOWN
PRAC1	-3.90738	-1.92686	10.5408	0.00116771	0.0198791	DOWN
C7	-1.05021	6.38639	10.5182	0.00118202	0.0200351	DOWN
SPANXB1	-3.53169	-0.413226	10.497	0.0011957	0.0202338	DOWN
SPINK4	-1.96685	0.89059	10.4682	0.00121444	0.0204176	DOWN
TSPY2	3.73199	-3.42165	10.4641	0.00121718	0.0204526	UP
FLJ16779	-1.4282	-3.68362	10.4205	0.00124626	0.0208286	DOWN
SELV	1.95157	-3.59841	10.4174	0.00124832	0.0208407	UP
IFIT1B	-1.50797	-2.43806	10.3976	0.00126182	0.0210434	DOWN
MRGPRX3	-2.49348	-2.96643	10.3794	0.0012743	0.0212061	DOWN
NPHS2	-2.19222	0.977732	10.3526	0.00129294	0.0214131	DOWN
OCA2	-1.21635	1.19654	10.3148	0.00131968	0.0217632	DOWN
KLK5	-2.57063	1.64007	10.3129	0.00132105	0.0217742	DOWN
PAX3	1.61679	0.349355	10.304	0.00132744	0.0218564	UP
CEACAM8	-1.53308	-2.76933	10.2808	0.00134418	0.0220721	DOWN
TMPRSS11D	-2.17924	0.839252	10.2664	0.00135475	0.0221863	DOWN
LOC101928419	-1.04062	-3.7917	10.2619	0.00135805	0.0221863	DOWN
CHGA	-2.39381	1.94464	10.2617	0.00135818	0.0221863	DOWN
SERPINA7	-2.83387	-0.215212	10.2541	0.00136384	0.0222553	DOWN
IL36A	-2.03584	-3.12711	10.2502	0.00136671	0.0222761	DOWN
KRT71	1.33752	-3.54224	10.2455	0.0013702	0.0223123	UP
KLK11	-1.68976	1.20469	10.2433	0.0013718	0.0223266	DOWN
TBC1D3B	-1.11347	-3.26694	10.2246	0.0013858	0.0225073	DOWN
TRIM15	-1.87325	-2.08934	10.2193	0.00138979	0.0225486	DOWN
GABRP	1.18753	5.26342	10.2136	0.00139407	0.0225944	UP
C4orf45	1.38834	-4.21116	10.2039	0.00140145	0.0226432	UP
HPN	-1.2394	0.510788	10.1817	0.00141844	0.0228138	DOWN
LY6G6E	1.60649	-4.12942	10.1813	0.0014187	0.0228138	UP
C2orf91	1.16469	-3.45337	10.1566	0.00143787	0.0230044	UP
EPGN	1.09948	1.28689	10.1555	0.00143869	0.0230057	UP
CIB4	1.32418	-3.84043	10.1338	0.00145574	0.0232068	UP
IGFN1	-1.08398	5.82597	10.1254	0.0014624	0.0233009	DOWN
USP41	-1.6468	-2.62339	10.1157	0.00147014	0.0233883	DOWN
CACNG5	1.35358	-3.57352	10.0927	0.00148859	0.0236334	UP
CLEC2A	-2.33449	1.529	10.0849	0.00149486	0.0236846	DOWN
APCDD1L	-1.06269	-1.53082	10.08	0.00149887	0.0237118	DOWN
HAPLN1	-1.03906	0.814213	10.0689	0.00150795	0.0237962	DOWN
KIR2DL3	1.14603	-2.59511	10.0633	0.00151254	0.0238553	UP
CLEC3A	-2.32207	-0.648871	10.0521	0.00152176	0.0239319	DOWN
DBX1	2.79784	-4.17525	10.0428	0.00152948	0.024025	UP
KRT6B	-1.82054	7.69198	10.0289	0.00154104	0.0241538	DOWN
SCRT2	1.77128	-4.30746	10.0283	0.00154157	0.0241538	UP
F9	-5.70585	1.08831	9.98622	0.00157716	0.0245383	DOWN
LRRC74B	-2.10388	-2.688	9.97017	0.00159097	0.0247002	DOWN
SIAH3	1.00285	-2.78958	9.93986	0.00161738	0.0249385	UP
VENTXP1	1.0211	-4.33722	9.93198	0.00162432	0.0249845	UP
LOC102723552	1.06269	-4.30975	9.91589	0.00163858	0.025154	UP
B4GALNT2	-1.74477	0.560534	9.89556	0.00165678	0.0253457	DOWN
C1orf158	2.16483	-3.92095	9.89443	0.0016578	0.0253489	UP
TRIM49C	2.98502	-3.64349	9.88169	0.00166931	0.0254624	UP
CPS1	-1.06795	5.60407	9.87141	0.00167867	0.025572	DOWN
SMLR1	-3.14322	-2.26209	9.86552	0.00168405	0.0256242	DOWN
KRT16P3	-1.55333	-2.97002	9.83892	0.00170858	0.0258865	DOWN
ASTN1	1.01484	-0.0201277	9.83011	0.00171678	0.0259824	UP
MBL2	-4.98904	-2.5855	9.82318	0.00172326	0.0260678	DOWN
WFDC6	-3.38718	-3.22928	9.79048	0.00175418	0.0264711	DOWN
OR2M4	1.6456	-4.02602	9.7815	0.00176276	0.0265362	UP
FMO6P	-1.88499	-2.03599	9.77467	0.00176932	0.0266092	DOWN
FOXI2	-1.24082	-3.60101	9.73247	0.00181041	0.0270309	DOWN
EN2	1.00121	-1.48629	9.71545	0.00182726	0.0272563	UP
OR4D5	1.6894	-4.06685	9.68219	0.00186063	0.0276744	UP
SCGB1A1	-2.20749	0.686816	9.6749	0.00186802	0.0277211	DOWN
PAGE4	1.86646	0.223812	9.6747	0.00186823	0.0277211	UP
CIDEA	1.18994	-0.68652	9.66255	0.00188062	0.0278253	UP
OR9Q1	2.04942	-3.93373	9.65673	0.00188659	0.0278871	UP
SFTA3	-4.60598	-2.58141	9.65233	0.00189111	0.0279141	DOWN
LRRTM3	-1.53632	-0.787541	9.63249	0.00191165	0.0281637	DOWN
LOC101928694	1.06301	-3.59306	9.63069	0.00191352	0.028178	UP
AKR1D1	-2.18604	-0.862958	9.62651	0.00191789	0.0282289	DOWN
LINC00982	1.04313	-3.28674	9.6162	0.00192868	0.0283475	UP
SH2D5	-1.23728	-2.4175	9.61457	0.0019304	0.0283593	DOWN
MYH2	-2.32354	4.13539	9.61097	0.00193418	0.0284015	DOWN
SLC22A25	-2.20953	-1.99161	9.59834	0.00194753	0.0285553	DOWN
ACTR3BP5	1.08588	-4.33555	9.58253	0.00196438	0.0287363	UP
B3GNT6	-2.07344	-4.07431	9.56326	0.0019851	0.0289441	DOWN
SLC17A3	-1.66834	-0.81007	9.51647	0.00203636	0.0295661	DOWN
LINC00967	-1.72894	-0.85194	9.51565	0.00203727	0.0295661	DOWN
CNBD1	1.07905	-2.13341	9.47031	0.00208824	0.0301931	UP
ANKRD33	1.07659	-2.91284	9.44517	0.00211706	0.030468	UP
LGALS14	2.07963	-3.10226	9.41785	0.00214883	0.0308966	UP
MT1JP	-1.42569	-3.10737	9.40803	0.00216037	0.0310339	DOWN
LIPF	-2.68894	-2.42425	9.36877	0.00220714	0.0315454	DOWN
GS1-600G8.3	1.75268	-0.45753	9.35549	0.00222318	0.0316727	UP
OR6K6	2.09771	-4.24082	9.34695	0.00223357	0.031748	UP
THEM5	1.27925	-1.08313	9.34235	0.00223918	0.0317986	UP
SDR16C5	-1.15346	1.72182	9.32119	0.00226519	0.0320801	DOWN
C1QL3	1.11786	-3.46692	9.29979	0.0022918	0.0323978	UP
PABPC1P2	1.19093	-4.23025	9.28833	0.00230619	0.0325716	UP
FAM9B	-2.51798	-1.60955	9.24964	0.00235541	0.0330715	DOWN
MT1DP	-1.3223	-3.50786	9.22591	0.00238614	0.0333823	DOWN
ABCG5	-1.94917	-0.391113	9.22082	0.00239278	0.0334301	DOWN
LHX3	1.03055	-4.26109	9.20038	0.00241965	0.0336738	UP
FGFBP1	-1.38052	1.84757	9.20013	0.00241997	0.0336738	DOWN
CCL21	-1.10706	3.14221	9.19801	0.00242278	0.0336978	DOWN
AMER3	2.19688	-4.15421	9.18811	0.00243592	0.0338352	UP
NPPA	2.94851	-4.0574	9.18006	0.00244666	0.0338934	UP
CPB1	-2.25739	0.943528	9.1787	0.00244848	0.0339035	DOWN
SLC22A2	-2.13827	-1.33984	9.16362	0.00246874	0.0341495	DOWN
IGFL3	-2.2488	-2.70918	9.15465	0.00248087	0.0342757	DOWN
ADH7	-1.73984	3.01256	9.14945	0.00248793	0.0343579	DOWN
BBOX1	-1.13191	0.259565	9.14241	0.00249752	0.0344268	DOWN
MT1B	-4.0224	-3.42271	9.13332	0.00250996	0.0345701	DOWN
TSPEAR-AS1	1.2319	-2.71264	9.11856	0.00253029	0.0347252	UP
MLIP	-1.14156	0.213482	9.11785	0.00253128	0.0347252	DOWN
LINC00470	1.49056	-2.00474	9.09614	0.00256149	0.0350777	UP
OR10G9	2.25197	-4.15976	9.06866	0.00260027	0.0355306	UP
LGALS7B	-2.17063	-1.38581	9.06171	0.00261017	0.035606	DOWN
C5orf58	1.4218	-1.3407	9.03466	0.00264908	0.0360076	UP
MUC17	-1.67319	-0.226869	9.02872	0.00265771	0.0360932	DOWN
AZU1	-1.13036	-3.66218	9.02722	0.00265989	0.0361071	DOWN
KRT6C	-1.81572	6.08666	9.02369	0.00266502	0.0361344	DOWN
TGM3	-1.05103	-1.27934	9.01361	0.00267977	0.0362977	DOWN
LRRN4	-1.11988	-1.605	9.01148	0.00268289	0.0363084	DOWN
MYL2	-2.78294	1.5161	9.00023	0.00269945	0.0365007	DOWN
MAGEB2	1.67082	-0.790841	8.98453	0.00272276	0.0366766	UP
SLC13A1	-2.89816	-2.70743	8.96416	0.00275328	0.0369393	DOWN
MYF6	-2.24628	-2.11461	8.96191	0.00275666	0.0369688	DOWN
OR10G8	1.85878	-4.22527	8.95879	0.00276137	0.037	UP
LINC01419	2.06725	-3.82144	8.94835	0.00277721	0.0371641	UP
GALR1	-1.32939	-3.5688	8.94622	0.00278044	0.0371914	DOWN
LOC102724177	1.15131	-4.04254	8.94355	0.0027845	0.0372297	UP
CTSLP2	-1.67145	-4.18361	8.93312	0.00280046	0.0374108	DOWN
CNPY1	1.21749	-4.25619	8.91133	0.00283406	0.0377948	UP
TMEM213	-1.86476	-3.00504	8.89516	0.00285927	0.0380331	DOWN
STATH	-5.05182	0.860081	8.89015	0.00286713	0.038105	DOWN
CELA3B	1.94934	-4.09211	8.85997	0.00291492	0.0386269	UP
GRP	-1.10808	-1.1179	8.84953	0.00293164	0.0387965	DOWN
LMOD2	-3.40513	-1.70725	8.82709	0.00296792	0.0391765	DOWN
LOC101928517	1.0463	-4.33176	8.82338	0.00297396	0.0392226	UP
LMNTD1	-1.1531	-1.63019	8.8134	0.00299026	0.0393608	DOWN
NPW	1.11593	-3.84862	8.77087	0.0030608	0.0400961	UP
KLK13	-1.71397	-0.05013	8.73965	0.00311364	0.0405524	DOWN
FAM74A7	-1.47654	-4.25436	8.7349	0.00312177	0.0405717	DOWN
DBH	-1.12029	-1.68715	8.68322	0.00321152	0.0414889	DOWN
LHX9	1.09818	-1.64036	8.68091	0.00321561	0.0415118	UP
VSTM2A	-1.64597	-2.14099	8.67555	0.00322508	0.0415478	DOWN
KDM4E	-3.11945	-2.69756	8.67276	0.00323002	0.041577	DOWN
F7	-1.22159	-1.57908	8.65836	0.00325564	0.0418375	DOWN
GBX1	1.23298	-2.38465	8.65754	0.0032571	0.041839	UP
ACSM4	1.47984	-4.2666	8.65131	0.00326826	0.0418785	UP
VCX3A	-1.53464	0.528985	8.62634	0.00331336	0.0422127	DOWN
ANKRD30A	1.49097	1.83916	8.56843	0.00342041	0.0431697	UP
LOC101928884	1.41985	-4.21658	8.54035	0.00347359	0.0436459	UP
NLRP7	-1.18987	4.1374	8.53024	0.00349295	0.0437653	DOWN
TNXA	-1.01468	-1.98962	8.49236	0.00356641	0.0444409	DOWN
SLC18A1	1.2041	-2.63952	8.4888	0.0035734	0.0445043	UP
NXPH2	1.21957	-3.15688	8.46434	0.00362177	0.0450165	UP
C12orf40	-1.2213	-3.55152	8.43023	0.00369033	0.0456497	DOWN
C1QTNF9B	-1.94628	-2.97615	8.42558	0.0036998	0.0457304	DOWN
DSC3	-1.1314	7.82281	8.38304	0.00378738	0.0464435	DOWN
C1orf140	-1.03949	-3.82805	8.37699	0.00380001	0.0465344	DOWN
SLC35D3	-1.18898	-2.25241	8.35896	0.00383791	0.0468808	DOWN
FAM169B	-1.96067	-4.02028	8.3558	0.00384458	0.0469084	DOWN
GABRA6	1.31101	-4.0947	8.33985	0.00387847	0.0471868	UP
KCNC1	1.47795	-3.6916	8.33371	0.0038916	0.0472791	UP
TMPRSS11A	-1.45021	0.926901	8.33033	0.00389886	0.0473438	DOWN
WFDC5	-1.21146	0.558204	8.32777	0.00390436	0.0473735	DOWN
ATP13A5	-1.68968	-0.233942	8.31805	0.00392529	0.0475533	DOWN
OR8D4	1.60343	-3.93232	8.31281	0.00393664	0.0476722	UP
OR13H1	1.32876	-4.08184	8.26813	0.0040347	0.0485569	UP
CHIAP2	1.77871	-3.4622	8.26102	0.00405055	0.048684	UP
SPATA22	-1.16571	-1.46328	8.25118	0.00407254	0.0488611	DOWN
NKX2-8	-1.22899	-3.66169	8.23383	0.00411167	0.0491787	DOWN
HAVCR1	-1.07305	6.18223	8.19111	0.00420961	0.0500038	DOWN
FAM133A	1.10358	-0.0727042	8.16442	0.004272	0.050571	UP
GDF2	-3.17114	-3.49484	8.11006	0.00440203	0.051694	DOWN
PAGE2B	1.22119	2.27625	8.10458	0.00441535	0.0517186	UP
ALX3	1.43718	-2.76745	8.10288	0.0044195	0.0517186	UP
PAX2	-2.2526	0.0775269	8.10259	0.0044202	0.0517186	DOWN
UGT2B7	-1.06572	3.71178	8.10246	0.00442052	0.0517186	DOWN
ENAM	-1.20636	-1.85342	8.07907	0.00447794	0.0522256	DOWN
SLC1A7	-1.02952	-0.314941	8.07797	0.00448066	0.0522256	DOWN
C10orf71	-2.06639	-0.795314	8.07577	0.0044861	0.0522694	DOWN
ATP12A	-1.21949	1.98949	8.05513	0.00453749	0.0525945	DOWN
OR5B2	-1.3383	-3.6063	8.04562	0.00456139	0.0527905	DOWN
LOC102723623	2.71351	-4.19038	8.03746	0.00458198	0.0529797	UP
C17orf74	1.07953	-3.70019	8.03644	0.00458455	0.0529797	UP
PLA2G1B	-1.09202	-3.34841	8.02663	0.00460944	0.0531883	DOWN
PTPRZ1	-1.12301	4.33166	8.01673	0.00463471	0.0534599	DOWN
KRT16P2	-1.26651	0.152086	8.00719	0.00465919	0.0536229	DOWN
OR51T1	-3.00445	-3.3893	7.91806	0.00489436	0.0555886	DOWN
OR1E1	-1.39339	-2.72325	7.91493	0.00490286	0.0556445	DOWN
KIR2DS2	1.31386	-4.2876	7.90761	0.00492273	0.0558089	UP
FXYD2	1.1707	0.558491	7.89549	0.00495581	0.0561126	UP
DSG4	-1.11349	0.174942	7.86541	0.00503893	0.0567401	DOWN
LOC100506358	1.93206	-3.87114	7.86454	0.00504137	0.0567401	UP
OR5H2	1.30904	-4.12983	7.83277	0.00513075	0.057458	UP
OR52E8	1.22507	-1.81637	7.8247	0.0051537	0.0576368	UP
LHFPL3	1.472	-4.20604	7.82441	0.00515453	0.0576368	UP
POTEM	1.08704	-0.801857	7.76974	0.00531287	0.0587326	UP
MOGAT3	-2.88808	-3.32551	7.7663	0.005323	0.0587818	DOWN
IL20	-1.58318	-1.41487	7.75751	0.00534895	0.0589195	DOWN
CLCA1	-1.83561	-2.13186	7.75567	0.00535442	0.0589195	DOWN
IGLL1	1.00962	-2.65378	7.74925	0.00537348	0.0589917	UP
CYP1A2	-2.46584	3.46982	7.74899	0.00537426	0.0589917	DOWN
PRAP1	-1.24292	0.413907	7.66436	0.00563224	0.0608775	DOWN
KRT25	2.51958	-3.90637	7.64289	0.00569967	0.0613716	UP
OR51A7	-2.71423	-3.50977	7.63924	0.00571118	0.061453	DOWN
LINC01159	-1.20976	-4.28217	7.6303	0.00573956	0.0616517	DOWN
MAP1LC3C	-1.08318	-3.37131	7.61603	0.00578518	0.0619156	DOWN
OR4F5	1.04855	-4.34847	7.61525	0.00578767	0.0619156	UP
MEGF11	1.30674	-0.947893	7.60962	0.00580577	0.0620626	UP
CYP2A7	-1.96679	-3.23346	7.5981	0.00584298	0.0623746	DOWN
REG1A	-2.13734	-1.48594	7.59447	0.00585476	0.0624535	DOWN
HORMAD2-AS1	-1.57459	-3.65048	7.58993	0.00586953	0.0624863	DOWN
LOC101929291	-1.11049	-3.45983	7.55464	0.00598559	0.0633315	DOWN
SLC17A8	-1.2415	-0.453569	7.5488	0.00600502	0.0634939	DOWN
ERVW-1	-2.28746	-1.12948	7.5139	0.00612246	0.0643853	DOWN
PLA2G4B	-1.29194	-3.38578	7.4887	0.00620873	0.0650943	DOWN
TRIM48	2.13939	-3.6755	7.48192	0.00623216	0.0652739	UP
APOA5	-4.63953	-0.626904	7.45518	0.00632542	0.0660726	DOWN
SRY	-1.66769	-4.06252	7.45376	0.0063304	0.0660802	DOWN
KLK3	-2.54738	-1.36592	7.4409	0.00637581	0.0664204	DOWN
NPY2R	-1.53917	-3.89593	7.43407	0.00640005	0.0665391	DOWN
ADAD2	-1.02669	-3.14893	7.42168	0.00644426	0.06682	DOWN
FAM9A	1.8861	-4.14933	7.38443	0.0065791	0.0678785	UP
TMCO5A	-1.47874	-4.08793	7.37759	0.00660415	0.0681143	DOWN
GPR182	-1.30909	-2.75174	7.37069	0.00662954	0.0683082	DOWN
TMPRSS15	1.51349	-0.674624	7.36041	0.00666754	0.0686469	UP
MYLPF	-1.36092	-1.61172	7.31517	0.00683749	0.0700099	DOWN
FEZF2	1.61501	-4.19284	7.29973	0.00689648	0.070439	UP
KCNH6	-1.28786	-1.95442	7.29075	0.00693105	0.0707117	DOWN
PLD5	1.10367	-0.89582	7.28314	0.00696048	0.0709189	UP
NOTO	1.30611	-4.09588	7.25139	0.00708461	0.0717143	UP
CA5A	-2.46953	-3.50231	7.25081	0.00708688	0.0717143	DOWN
TBR1	-1.3772	-2.84076	7.24819	0.00709726	0.0717715	DOWN
HMMR-AS1	1.12252	-4.32374	7.21437	0.00723223	0.0727341	UP
KAAG1	1.41981	-4.32983	7.20288	0.00727865	0.0730701	UP
SLC12A1	-2.25455	1.87501	7.18489	0.00735201	0.0736528	DOWN
CPA1	-1.12485	-2.90061	7.18028	0.00737093	0.0738185	DOWN
KRT78	-1.00224	-0.943685	7.16696	0.00742584	0.074082	DOWN
LOC101927680	-1.48307	-4.18785	7.16007	0.00745442	0.0743088	DOWN
CRTAC1	-1.09147	5.05504	7.15957	0.0074565	0.0743088	DOWN
SLN	-1.3494	-3.07359	7.14981	0.00749718	0.0745783	DOWN
TRH	1.0349	-4.18963	7.14708	0.00750862	0.0746444	UP
CRP	-2.45738	4.84234	7.14605	0.00751293	0.0746633	DOWN
TFF1	-1.29072	1.90904	7.11503	0.00764402	0.0756738	DOWN
CDSN	-1.14212	2.98261	7.10974	0.0076666	0.0757305	DOWN
CCDC37	-1.5276	-3.64105	7.10748	0.00767631	0.0757782	DOWN
LEFTY1	-1.11883	-3.22018	7.10331	0.00769416	0.0758427	DOWN
RAG2	-2.41156	-2.95119	7.10296	0.00769567	0.0758427	DOWN
DPPA3	-5.57784	-0.693728	7.08928	0.00775463	0.076181	DOWN
GAB4	1.69974	-2.61286	7.0702	0.00783763	0.0767233	UP
SLC6A15	1.29171	0.95016	7.04758	0.00793723	0.0773712	UP
LOC284898	2.61443	-4.21136	7.01903	0.00806479	0.0781295	UP
ECEL1P2	1.15727	-3.79784	6.98361	0.00822593	0.0791431	UP
LOC158434	-1.50974	-2.78741	6.9704	0.00828688	0.0794759	DOWN
KRT72	-1.10889	-1.70034	6.96481	0.00831284	0.079608	DOWN
KRT9	-1.1798	0.634818	6.96029	0.00833387	0.0796883	DOWN
LOC101930665	2.35545	-3.79471	6.94757	0.00839331	0.0800496	UP
LOC101928631	-1.21657	-4.24537	6.89889	0.00862491	0.0816432	DOWN
IFNA7	-4.61061	-2.55141	6.89712	0.00863347	0.0816738	DOWN
ADORA2A-AS1	-1.64047	-3.86577	6.88212	0.00870622	0.0820623	DOWN
REG3G	-2.13258	-4.0823	6.87737	0.00872937	0.0822307	DOWN
DAO	-1.38971	-1.88901	6.86285	0.00880063	0.0827765	DOWN
TRIM10	-1.35901	-2.46258	6.86165	0.00880651	0.0827817	DOWN
ACPT	1.2372	-4.21347	6.85446	0.00884204	0.0830404	UP
PLGLA	-3.72839	-3.19842	6.85303	0.00884909	0.0830564	DOWN
SCN1A	-1.20011	-0.370864	6.83521	0.0089378	0.0834857	DOWN
KERA	1.07441	-1.43416	6.81981	0.00901523	0.0841065	UP
LOC101926943	-2.3871	-1.65424	6.80388	0.00909601	0.0845317	DOWN
C2orf78	-3.1228	-2.83238	6.80211	0.00910501	0.0845901	DOWN
GNMT	-1.05248	-3.07124	6.73582	0.00944959	0.0868977	DOWN
SLURP1	1.05007	-2.46119	6.73495	0.00945417	0.086899	UP
CACNG7	1.71405	-4.02993	6.72596	0.00950196	0.0872093	UP
OLFM4	-1.22219	6.49345	6.69311	0.00967863	0.0882834	DOWN
BPIFB1	-1.13932	3.94108	6.69103	0.00968994	0.0883347	DOWN
LGALS9C	-1.02704	-3.57446	6.68209	0.00973866	0.0885711	DOWN
FLG2	-1.62529	3.55777	6.67474	0.00977889	0.0887688	DOWN
PAH	-1.42149	2.86679	6.67304	0.00978818	0.0887877	DOWN
PPP1R27	-1.41349	-1.48142	6.66794	0.00981625	0.0889903	DOWN
HS3ST4	1.26733	-2.10021	6.63481	0.0100005	0.0901949	UP
SHANK2-AS3	1.59419	-4.31025	6.62837	0.0100367	0.0904087	UP
XAGE3	-4.22583	-0.788199	6.61238	0.0101272	0.0910398	DOWN
OR52E6	1.19943	-1.8275	6.60392	0.0101755	0.0913149	UP
TMEM72	-2.03455	-3.72638	6.60094	0.0101925	0.0913886	DOWN
PRAMEF19	-3.77929	-2.81859	6.59471	0.0102282	0.0916032	DOWN
TUBA3C	2.17721	-0.657821	6.57765	0.0103267	0.0923257	UP
CTXN2	1.08554	-3.93228	6.57589	0.0103369	0.0923638	UP
ZFP57	-1.29135	2.91084	6.56558	0.010397	0.0926898	DOWN
DEFA3	-1.61479	-2.5118	6.56553	0.0103973	0.0926898	DOWN
ATP1B4	-2.61608	-3.22017	6.55832	0.0104395	0.0929721	DOWN
LOC102724018	-1.02649	-4.24136	6.55808	0.0104409	0.0929721	DOWN
KRT16	-1.00236	8.89781	6.54332	0.0105278	0.0935681	DOWN
PLA2G3	-1.29041	-2.03323	6.54315	0.0105289	0.0935681	DOWN
FOXG1	-1.34714	1.06098	6.52815	0.010618	0.0941179	DOWN
DEFA4	-1.4452	-4.12918	6.51184	0.0107159	0.094769	DOWN
MUC13	-1.19291	1.6999	6.50584	0.0107521	0.0950625	DOWN
STOML3	-1.14809	-2.62179	6.46679	0.0109909	0.0966787	DOWN
IRX1	-1.43535	-2.11169	6.45914	0.0110383	0.0970137	DOWN
KLK10	-1.41071	0.874588	6.44883	0.0111025	0.0974678	DOWN
LBX1-AS1	1.49556	-3.53099	6.44689	0.0111147	0.0975469	UP
MROH5	2.61917	-3.90755	6.44167	0.0111474	0.0977243	UP
PPP1R3A	-2.57244	-1.33741	6.39973	0.0114138	0.0993388	DOWN
NUTM1	-1.16858	-1.54973	6.38417	0.0115143	0.100009	DOWN
APOC4-APOC2	-1.60448	-4.15897	6.37502	0.0115738	0.100386	DOWN
GRM6	-1.59603	-1.53947	6.37203	0.0115933	0.100447	DOWN
IGFBP1	-1.4732	-0.640165	6.34525	0.0117696	0.101462	DOWN
KRTDAP	-1.31517	3.70511	6.34303	0.0117844	0.101543	DOWN
SPP2	-4.86815	-2.1454	6.3374	0.0118218	0.101647	DOWN
TRIM71	1.07522	-0.855402	6.32614	0.0118971	0.101882	UP
CCDC140	1.38843	-4.11112	6.31985	0.0119394	0.10216	UP
LOC102724239	1.03327	-4.32164	6.31024	0.0120042	0.102405	UP
IFNA10	-4.47704	-2.70211	6.3096	0.0120086	0.102414	DOWN
SCGB1D4	1.09411	-4.33628	6.26948	0.0122835	0.103985	UP
FCAMR	-1.05524	-1.13467	6.25914	0.0123554	0.104369	DOWN
GSG1	1.04439	-3.92212	6.2515	0.0124088	0.104593	UP
C10orf53	1.76543	-4.2813	6.23805	0.0125034	0.105077	UP
SLC5A10	-1.22544	-2.97552	6.23624	0.0125162	0.105096	DOWN
ESX1	1.2025	-3.44883	6.21364	0.012677	0.106077	UP
CLDN22	-1.12168	-2.18257	6.21298	0.0126817	0.106088	DOWN
LOC100286906	1.57842	-4.09969	6.18559	0.0128795	0.107223	UP
ASB14	-1.05305	-3.49964	6.14321	0.0131918	0.109064	DOWN
PANX3	1.32824	-2.72137	6.14242	0.0131977	0.109083	UP
PRAME	1.04016	1.97363	6.11528	0.0134018	0.1104	UP
PRSS2	-1.3383	2.60897	6.10779	0.0134587	0.110594	DOWN
LRRC31	-1.13063	-1.18859	6.06486	0.0137897	0.112384	DOWN
SST	-2.11988	3.65444	6.06229	0.0138098	0.112468	DOWN
LRTM1	-1.98029	-1.92149	6.05965	0.0138305	0.112519	DOWN
PLA2G4E	-1.02348	1.76591	6.03296	0.0140411	0.113667	DOWN
S100G	-5.04284	-2.807	6.01552	0.0141806	0.114439	DOWN
ATP13A4-AS1	-3.50614	-3.43744	6.0128	0.0142025	0.114568	DOWN
KRTAP19-3	2.00859	-3.90553	5.99403	0.0143544	0.115303	UP
LOC100133920	1.09102	-4.30421	5.98655	0.0144154	0.115577	UP
LGALS7	-2.25271	-2.88204	5.98153	0.0144564	0.115674	DOWN
PP12613	1.11288	-4.01409	5.96384	0.0146022	0.116569	UP
LOC102723680	1.69964	-2.11336	5.91018	0.0150536	0.119134	UP
MS4A10	1.32801	-4.04857	5.90122	0.0151304	0.119558	UP
DAZ2	3.02402	-2.99509	5.88179	0.0152983	0.120477	UP
SYT4	1.50655	-1.92941	5.86918	0.0154082	0.120954	UP
LOC102723771	1.1212	-3.4147	5.84433	0.0156273	0.122027	UP
C4B_2	-1.26001	-4.11785	5.83321	0.0157264	0.122616	DOWN
PSG9	-1.52379	0.45502	5.81387	0.0159003	0.123569	DOWN
SMR3B	-5.5776	1.01504	5.80721	0.0159606	0.123852	DOWN
ATP4A	-1.34691	-2.10235	5.78901	0.0161267	0.124684	DOWN
APCS	-3.31729	1.74493	5.78189	0.0161921	0.124931	DOWN
SPATA31A1	1.63457	-3.86668	5.77713	0.0162361	0.125239	UP
KRT84	-1.50915	-3.55933	5.7571	0.0164222	0.125925	DOWN
SLC22A12	-2.73988	-2.40971	5.74424	0.0165428	0.126382	DOWN
IFNA13	-2.26555	-4.13624	5.73674	0.0166136	0.126662	DOWN
RS1	1.43907	-3.98006	5.73648	0.0166161	0.126662	UP
TMEM196	1.03697	-4.24802	5.72497	0.0167253	0.127225	UP
ONECUT1	1.01206	-0.694116	5.72414	0.0167332	0.127243	UP
GCG	-6.96152	-0.373506	5.71844	0.0167876	0.127469	DOWN
UGT2B4	-1.73042	1.58765	5.7087	0.0168811	0.12796	DOWN
PATE4	2.60103	-4.20021	5.70379	0.0169284	0.128225	UP
ALX1	-1.04262	0.329474	5.68958	0.0170659	0.128921	DOWN
LOC100129520	1.45767	-0.153699	5.67884	0.0171707	0.129461	UP
OR5H14	1.25853	-4.2509	5.6713	0.0172446	0.129813	UP
C20orf166	-1.39518	-3.50391	5.67038	0.0172538	0.129813	DOWN
CRISP1	2.12285	-3.38791	5.66425	0.0173141	0.130007	UP
ZPBP	-1.14255	-3.59429	5.65514	0.0174043	0.130526	DOWN
LOC339685	1.29544	-4.3296	5.65328	0.0174227	0.130588	UP
HSFY2	1.28572	-4.3186	5.648	0.0174753	0.130869	UP
USP17L1P	-2.38405	-3.91363	5.63244	0.017631	0.131781	DOWN
GHRHR	-1.65395	-1.40748	5.62295	0.0177268	0.132179	DOWN
HRNR	-1.29817	-1.1595	5.61893	0.0177675	0.132313	DOWN
FAM69C	-1.21153	-3.72365	5.59476	0.0180143	0.133237	DOWN
OLIG1	1.04514	-4.06964	5.58877	0.018076	0.133507	UP
POTEA	1.46799	-2.59324	5.56394	0.0183341	0.134481	UP
CSRP3	-5.82775	1.52816	5.54516	0.0185318	0.135298	DOWN
OR7E5P	1.57634	-3.52992	5.53712	0.0186172	0.135725	UP
LOC650226	1.40466	-2.8325	5.52884	0.0187055	0.136082	UP
SPATA16	-2.13694	-1.93707	5.50191	0.0189957	0.137502	DOWN
LOC102723517	1.0392	-4.34427	5.46341	0.0194187	0.13925	UP
IFNA4	-4.38456	-3.29646	5.43798	0.0197034	0.140482	DOWN
MAGEB4	1.63918	-4.07222	5.42751	0.019822	0.140974	UP
CYLC2	1.21738	-4.3081	5.41855	0.0199239	0.141429	UP
SLCO1B3	-1.2754	3.08071	5.40778	0.0200472	0.142105	DOWN
LOC101448202	1.25924	-3.88733	5.38783	0.0202776	0.143034	UP
CELP	-1.14148	-2.46584	5.36782	0.0205116	0.144209	DOWN
FGF23	-2.05468	-3.36761	5.33392	0.0209143	0.145935	DOWN
DEFA6	2.43673	-3.72368	5.32337	0.0210413	0.146603	UP
SYNPR	1.57716	-3.4667	5.32256	0.0210511	0.146627	UP
NLRP13	-2.59567	-2.74916	5.31709	0.0211172	0.146922	DOWN
DSTNP4	1.1103	-4.27367	5.31263	0.0211713	0.147167	UP
CLEC4M	-1.16449	0.63454	5.30842	0.0212226	0.147397	DOWN
SERPINB3	-1.0242	6.99016	5.25522	0.021881	0.150485	DOWN
CSH2	-2.36711	-3.09272	5.24551	0.0220035	0.150993	DOWN
OR2T10	-1.02964	-3.04097	5.23815	0.0220968	0.151366	DOWN
LOC101928658	-1.35716	-4.22184	5.23399	0.0221497	0.151629	DOWN
FBP2	-1.75753	-1.42288	5.23073	0.0221912	0.151846	DOWN
GAGE12H	-4.72807	-1.30681	5.22397	0.0222777	0.152278	DOWN
ZIC4	1.04448	-3.93819	5.21991	0.0223297	0.152458	UP
CCKBR	1.58142	-2.45968	5.20965	0.0224619	0.153092	UP
NR1I3	-1.10595	-1.87252	5.20664	0.0225008	0.15324	DOWN
RTP3	-2.48173	-2.96885	5.19524	0.0226488	0.153927	DOWN
IFNA21	-4.55677	-2.1071	5.17558	0.0229065	0.155068	DOWN
DRGX	1.1254	-4.04619	5.16368	0.023064	0.155807	UP
C1orf100	1.02343	-4.28966	5.15833	0.0231352	0.155967	UP
SOSTDC1	1.00057	1.22583	5.14783	0.0232754	0.156475	UP
OR5V1	-2.89292	-3.81619	5.12488	0.0235852	0.157773	DOWN
ANKRD62P1-PARP4P3	2.05673	-3.78333	5.1055	0.0238501	0.158861	UP
DMRT1	1.01533	-3.13697	5.102	0.0238983	0.15908	UP
LCE2B	-1.68242	-3.97691	5.09218	0.0240339	0.159674	DOWN
OC90	1.63636	-4.19882	5.07269	0.0243057	0.160827	UP
OR4A47	-2.88001	-3.74112	5.05107	0.0246108	0.162259	DOWN
RGR	1.43362	-4.08967	5.04546	0.0246905	0.162647	UP
CRH	-1.4468	1.14366	5.0405	0.0247613	0.162802	DOWN
ISX	-2.33591	-3.54077	5.03636	0.0248206	0.163103	DOWN
THEG	-1.19809	-2.99136	5.01739	0.025094	0.164399	DOWN
MAGEA4	-1.14856	2.87478	5.00699	0.0252452	0.165007	DOWN
NAA11	1.99989	-1.51866	5.00533	0.0252694	0.165095	UP
DNTT	-1.19247	-2.92808	5.00278	0.0253066	0.165177	DOWN
HTR3C	-1.31765	-2.90416	4.99308	0.0254489	0.165885	DOWN
ATXN8OS	1.47636	-4.26825	4.98969	0.0254988	0.16614	UP
KRTAP9-4	1.319	-4.29404	4.9885	0.0255163	0.166185	UP
OR2T33	1.33793	-4.24844	4.975	0.0257162	0.16704	UP
CPLX2	1.16435	-2.9863	4.96335	0.02589	0.167552	UP
LOC102724971	1.06122	-3.19209	4.96067	0.0259301	0.16772	UP
KCNIP4	-1.06669	-1.99366	4.95412	0.0260286	0.168195	DOWN
TCP11X1	1.43961	-4.20519	4.95083	0.0260782	0.168351	UP
OR10S1	1.07018	-4.28974	4.94137	0.0262212	0.168865	UP
SLCO1B7	-1.48107	0.288359	4.93054	0.026386	0.169516	DOWN
PRDM13	1.17884	-3.80176	4.93043	0.0263877	0.169516	UP
LOC101929645	1.46293	-4.21467	4.92931	0.0264048	0.169591	UP
CALB1	-1.18673	3.47272	4.89729	0.0268989	0.171616	DOWN
TMPRSS11B	-2.12239	-1.77008	4.85218	0.0276112	0.174491	DOWN
LOC390956	-1.37497	-4.04108	4.84324	0.0277548	0.175043	DOWN
LOC101930278	1.00735	-2.95388	4.80225	0.0284226	0.178134	UP
DEFB116	2.05182	-4.25466	4.80138	0.028437	0.178188	UP
IQCJ-SCHIP1	-1.71684	-4.11283	4.7854	0.028702	0.1793	DOWN
DNMT3L	-3.41133	-3.35369	4.77141	0.0289362	0.179958	DOWN
SLC9A3	-1.14034	-1.1544	4.76232	0.0290893	0.180493	DOWN
BMP10	-1.06234	-3.07937	4.75552	0.0292045	0.180809	DOWN
EFCAB3	-2.73073	-3.45898	4.75481	0.0292166	0.180814	DOWN
S100A7A	-1.59646	0.83476	4.75159	0.0292712	0.181044	DOWN
KRTAP19-4	1.5744	-4.20106	4.71171	0.0299578	0.183802	UP
LGALS16	-3.79205	-3.05732	4.71038	0.029981	0.18386	DOWN
AHSP	-1.06127	-2.07152	4.70837	0.0300161	0.183967	DOWN
LOC102723493	-1.43038	-4.18813	4.69121	0.0303172	0.184937	DOWN
HTR1E	1.06638	-3.65017	4.68838	0.0303673	0.185098	UP
HTN1	-5.39995	-1.21844	4.68348	0.030454	0.185481	DOWN
PRR27	-3.35813	-3.01869	4.6743	0.0306172	0.186292	DOWN
TSPY1	3.45796	-2.96932	4.66448	0.0307927	0.186843	UP
AMY1A	-1.56536	-4.10477	4.63701	0.0312895	0.188867	DOWN
LOC101928666	-1.06466	-3.97026	4.61931	0.031614	0.190051	DOWN
C21orf54	1.86854	-4.27469	4.61573	0.03168	0.190337	UP
LOC100653057	-1.08012	-2.40615	4.61172	0.0317542	0.190415	DOWN
LOC101929538	1.0601	-4.31318	4.60161	0.0319419	0.191245	UP
SERTM1	-1.27628	-2.77639	4.59356	0.0320923	0.191813	DOWN
DHRS7C	1.31425	-4.18389	4.58596	0.0322348	0.192464	UP
POU1F1	-1.37642	-3.28984	4.57481	0.0324454	0.193406	DOWN
CARD18	-1.59249	-1.75909	4.56418	0.0326473	0.194234	DOWN
CA6	-2.00595	-3.00777	4.52292	0.0334438	0.197236	DOWN
FABP1	-2.25298	2.24759	4.51601	0.033579	0.197738	DOWN
MYH4	-1.78761	-3.66571	4.48415	0.0342106	0.200352	DOWN
KIR2DL1	1.02773	-3.24948	4.4789	0.0343159	0.20078	UP
GJD2	1.23099	-4.15515	4.46382	0.0346199	0.201928	UP
LOC102724151	-1.01372	-4.19316	4.43069	0.0352983	0.204717	DOWN
ADAM18	1.05475	-3.63607	4.42857	0.0353422	0.204789	UP
OR8A1	1.04292	-1.38747	4.40746	0.0357821	0.206199	UP
SPRR2A	-1.28775	1.58744	4.3972	0.035998	0.207037	DOWN
CLDN24	-1.01923	-2.6402	4.39247	0.036098	0.207382	DOWN
HBM	-1.57237	-3.06524	4.38453	0.0362665	0.208119	DOWN
IL17A	1.14292	-2.83527	4.37489	0.0364721	0.208798	UP
HNF1A	-1.18049	-0.655072	4.36898	0.036599	0.20937	DOWN
KRTAP3-2	1.88754	-3.85276	4.35684	0.0368606	0.210491	UP
AMELX	1.3256	-3.99472	4.35373	0.036928	0.210632	UP
BARHL2	1.55294	-3.72946	4.3482	0.037048	0.210893	UP
PRAMEF15	1.06766	-4.32109	4.33395	0.0373594	0.211926	UP
LOC102723631	1.56916	0.599155	4.31816	0.0377076	0.213283	UP
GJA8	-1.3766	-3.72996	4.30557	0.0379877	0.214239	DOWN
ADAM7	1.58559	-3.55275	4.30289	0.0380476	0.214421	UP
CYLC1	1.25516	-4.21248	4.29208	0.0382903	0.215183	UP
S100A7	-1.06648	6.39813	4.27844	0.0385987	0.216155	DOWN
GLRA1	1.30113	-4.264	4.2683	0.0388298	0.21702	UP
HSFY1	1.15806	-4.31058	4.26416	0.0389245	0.217432	UP
WFDC8	-2.02457	-3.72491	4.25023	0.039245	0.218246	DOWN
COL4A2-AS2	-1.35262	-3.68701	4.22948	0.0397275	0.219941	DOWN
SPRR2B	-2.50957	-2.72218	4.22029	0.0399434	0.220672	DOWN
KRTAP19-5	1.62543	-4.20973	4.21391	0.0400937	0.221033	UP
KCNQ2	1.22657	-0.480677	4.21135	0.0401545	0.221241	UP
OR7A10	1.14717	-4.33246	4.17813	0.0409489	0.223872	UP
KLK12	-1.42799	0.123953	4.16206	0.0413391	0.225564	DOWN
TCF23	-1.0525	-3.38614	4.15115	0.0416062	0.226233	DOWN
LCE2C	-1.73542	-4.15826	4.15047	0.0416229	0.226284	DOWN
KLHL40	-2.15994	-3.51649	4.14635	0.0417244	0.226519	DOWN
NTS	-1.10961	4.24173	4.13124	0.0420984	0.227753	DOWN
TRIM49	2.06082	-3.44116	4.12659	0.0422144	0.228168	UP
NMRK2	-1.60885	-3.78967	4.11103	0.0426044	0.229604	DOWN
SERPINB11	-1.04224	-0.734185	4.10018	0.0428787	0.230376	DOWN
WFDC12	-1.61553	-3.11858	4.08284	0.0433207	0.231637	DOWN
SPATA19	-1.08905	-4.06592	4.07573	0.0435035	0.231963	DOWN
C3P1	-2.36962	-1.00698	4.06766	0.0437117	0.232555	DOWN
TMEM212	-1.26259	-3.89081	4.05193	0.0441209	0.234185	DOWN
SPRR2F	-1.65208	-2.17014	4.04558	0.0442872	0.234733	DOWN
DYTN	-2.02728	-3.89102	4.0248	0.0448361	0.236513	DOWN
C7orf33	1.5109	-3.94551	4.01441	0.045113	0.23737	UP
PLCZ1	1.04109	-3.03952	3.97971	0.0460515	0.240388	UP
TMEM82	-1.06156	-3.93849	3.96797	0.0463736	0.24159	DOWN
SLC17A6	-3.41118	-2.87311	3.96525	0.0464487	0.241842	DOWN
OR51F2	-2.68285	-3.626	3.95657	0.0466887	0.242527	DOWN
SSX5	1.8187	-3.07029	3.95478	0.0467384	0.242637	UP
PSG6	1.51326	0.578531	3.95046	0.0468585	0.243076	UP
SYCP1	1.13833	-3.7227	3.92043	0.0477027	0.245967	UP
LOC440416	1.11951	-0.835005	3.9192	0.0477375	0.246097	UP
C14orf23	-1.6093	-3.98639	3.91145	0.0479581	0.246917	DOWN
ETNPPL	1.01925	-0.6957	3.91075	0.0479783	0.24697	UP
GC	-1.9036	4.11411	3.90653	0.0480987	0.247426	DOWN
LOC100132146	-1.04691	-4.18865	3.90375	0.0481784	0.247742	DOWN
OR6Q1	-1.1095	-3.78162	3.88109	0.048833	0.250166	DOWN
FSHR	-1.01549	-3.54676	3.86795	0.0492165	0.251099	DOWN
KRT27	-1.10338	-2.56924	3.86158	0.0494038	0.251641	DOWN
CRCT1	-1.27078	-2.56422	3.85861	0.0494912	0.251787	DOWN
VCY1B	1.44004	-4.28657	3.85841	0.0494973	0.251787	UP
LOC102725101	1.11066	-4.23968	3.8529	0.0496602	0.252245	UP
